# Supplementary material for: A new green-to-blue upconversion system with efficient photoredox catalytic properties
Source: Royal Society of Chemistry journal article supplement (doi:10.1039/d3cp00811h), 2023-01-01
Supplement: d3cp00811h1.pdf [file d3cp00811h1.pdf]

Supporting Information

**New Green-to-Blue Upconversion System with Efficient Photoredox  
Catalytic Properties**

Jorge Castellanos-Soriano,<sup>a</sup> Till J. B. Zähringer,<sup>b</sup> Jorge C. Herrera-Luna,<sup>a</sup> M. Consuelo Jiménez,<sup>a</sup> Christoph Kerzig\*<sup>b</sup> and Raúl Pérez-Ruiz\*<sup>a</sup>

<sup>a</sup> Departamento de Química, Universitat Politècnica de Valencia, Camino de Vera S/N, 46022, Valencia, Spain

<sup>b</sup> Department of Chemistry, Johannes Gutenberg University Mainz, Duesbergweg 10-14, 55128 Mainz, Germany

\*Corresponding Authors

E-mails: [ckerzig@uni-mainz.de](mailto:ckerzig@uni-mainz.de); [raupreru@upv.es](mailto:raupreru@upv.es)

**TABLE OF CONTENTS**

|                                                                                          |     |
|------------------------------------------------------------------------------------------|-----|
| This page.....                                                                           | S1  |
| 1- Materials & Methods.....                                                              | S2  |
| 2- Synthesis of <b>BDP-Br</b> .....                                                      | S8  |
| 3- Crystallographic data of <b>BDP &amp; BDP-Br</b> .....                                | S11 |
| 4- Photophysical and photochemical properties.....                                       | S13 |
| 5- Cyclic Voltammetry.....                                                               | S19 |
| 6- Coupling reactions.....                                                               | S20 |
| 7- <sup>1</sup> H, <sup>13</sup> C, <sup>11</sup> B and <sup>19</sup> F NMR spectra..... | S23 |
| 8- Mass spectrum of <b>BDP-Br</b> .....                                                  | S31 |
| 9- Geometrical parameters from Crystallographic data.....                                | S32 |

## 1. Materials & Methods

### *Reagents*

Reagents ( $\geq 97\%$  purity) and solvents ( $\geq 99\%$  purity) used in this work were all purchased from commercial suppliers (Merck, TCI, Apollo Scientific, Fluorochem, Scharlab) and used as received unless otherwise indicated. Sensitizer **BDP-Br** was synthesized as described (*vide infra*), whereas the acceptor 2,5,8,11-tetra-*tert*-butylperylene (**TBPe**) is commercially available from Sigma Aldrich, 99% purity.  $[\text{Ru}(\text{bpy})_3](\text{PF}_6)_2$  was obtained by a counter ion exchange starting from  $[\text{Ru}(\text{bpy})_3]\text{Cl}_2$  (from Sigma Aldrich,  $> 99\%$  purity) and excess  $\text{NH}_4\text{PF}_6$ . Compound  $[\text{Os}(\text{phen})_3](\text{PF}_6)_2$  was prepared by following previously reported protocol.<sup>1</sup>

### *Reactions*

**General procedure:** In a 4mL quartz cuvette with a magnetic stirrer, 1 eq of 2-acetyl-5-chlorothiophene and the corresponding equivalents of trapping agent were placed in a solvent mixture composed by ACN/DMA 4:1, then 1 eq of dodecanenitrile as internal standard was added and the cuvette was sealed under Ar atmosphere, partially submerged in a cold water bath and irradiated by a Q-Switch laser (Quantel Brilliant,  $\lambda_{\text{exc}} = 532 \text{ nm}$ , 10 MHz,  $\sim 1 \text{ mJ}$  per pulse,  $\sim 5 \text{ ns}$  fwhm). The photoreaction was followed by TLC on commercial  $\text{SiO}_2$ -coated aluminium plates (DC60 F254, Merck). Visualization was done by UV-light 254 nm. After 4h, the crude of the reaction was extracted with ethyl acetate, washed with brine and evaporated under vacuum. Finally, the product was purified by high performance liquid chromatography (HPLC) using ACN/ $\text{H}_2\text{O}$  90/10 as eluent. Yield products were estimated as: [conversion  $\times$  selectivity]/mass balance.

### *Irradiation light sources*

The coupling reactions were carried out using a Quantel pulsed q-switched frequency doubled YAG laser (Quantel Brilliant B pulsed YAG laser,  $\lambda_{\text{exc}} = 532 \text{ nm}$ , 10 Hz,  $\sim 1 \text{ mJ}$  per pulse,  $\sim 4 \text{ ns}$  fwhm, Figure S1A). Additionally, experiments using green LEDs (AVONEC, 3W, 515-525 nm) were also performed (Figure S1B).

---

<sup>1</sup> K. D. Demadis, D. M. Dattelbaum, E. M. Kober, J. J. Concepcion, J. J. Paul, T. J. Meyer and P. S. White, *Inorganica Chim. Acta*, 2007, **360**, 1143–1153.

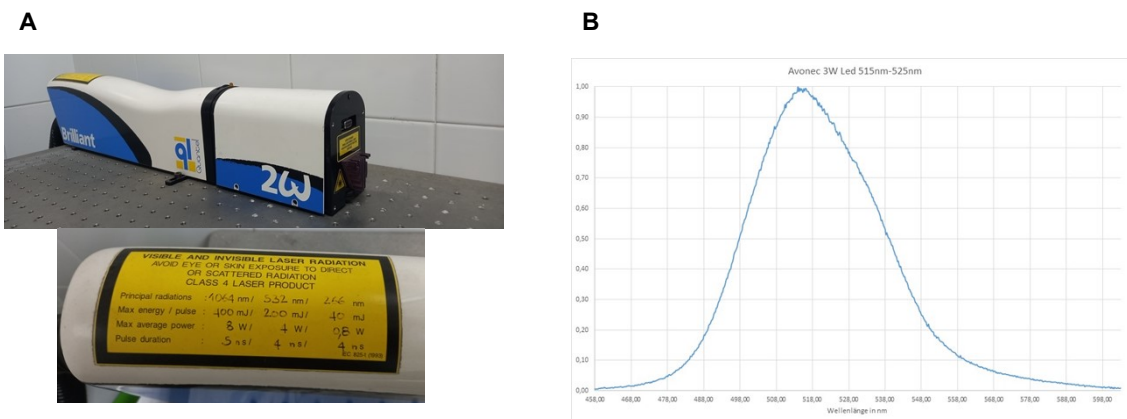

**Figure S1. A:** Pictures of the laser setup used in the photoreactions. **B:** Lamp emission spectrum of the green light LED.

A 514 nm laser from Roithner Lasertechnik with an adjustable output (maximum optical output of 800 mW) and a beam diameter of 3.0 mm<sup>2</sup> (see Figure S2 for data sheet) was used to examine the UC emission, UC quantum yield and photostability of **BDP-Br**.

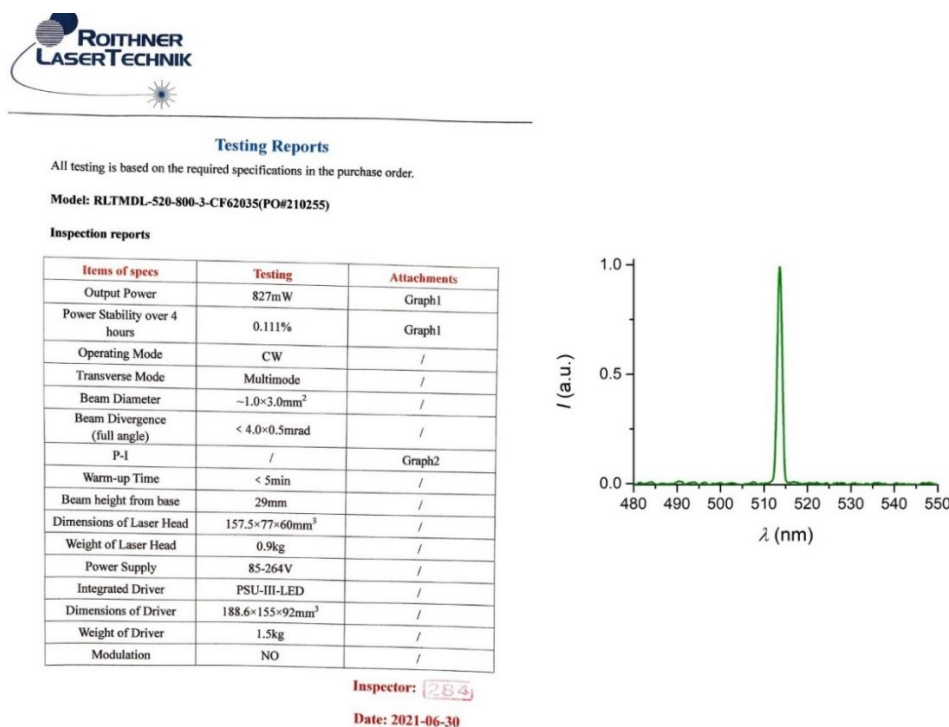

**Figure S2. Left:** Data sheet of the 514 nm cw laser from Roithner Lasertechnik. **Right:** Emission spectrum measured by irradiating a water-containing cuvette in the emission spectrometer (*i.e.*, by recording laser stray light).

### ***Characterization***

Determination of purity and structure confirmation of the literature known products was performed by  $^1\text{H}$ ,  $^{13}\text{C}$ ,  $^{19}\text{F}$ ,  $^{11}\text{B}$  and  $^{31}\text{P}$  NMR and low-resolution mass spectrometry (LRMS)—LRMS measurements were replaced by high-resolution mass spectrometry (HRMS) in case of unknown products. NMR spectral data were collected on a Bruker Advance 400 (400 MHz for  $^1\text{H}$ ; 101 MHz for  $^{13}\text{C}$ ; 376 MHz for  $^{19}\text{F}$ ; 128 MHz for  $^{11}\text{B}$ ; 162 MHz for  $^{31}\text{P}$ ) spectrometer at 20 °C. Chemical shifts are reported in  $\delta/\text{ppm}$ , coupling constants  $J$  are given in Hertz. Solvent residual peaks were used as internal standard for all NMR measurements. The quantification of  $^1\text{H}$  cores was obtained from integrations of appropriate resonance signals. Abbreviations used in NMR spectra: s = singlet, d = doublet, t = triplet, q = quartet, m = multiplet, bs = broad singlet, dd = doublet of doublet, ddd = doublet of doublet of doublet. HRMS was carried out was performed in the mass facility of SCSIE University of Valencia. LRMS was carried out on an HP 6890 Series GC System with Agilent 5973 Network Mass Selective Detector and  $\text{H}_2$  as carrier gas. Abbreviations used in MS spectra: M—molar mass of target compound, EI—electron impact ionization, ESI—electrospray ionization. For computing the data of X-Ray experiments the following specifications were used: Data collection: APPEX3v2022.1-1 (BRUKER AXS, 2021); cell refinement: SAINT V8.40B (Bruker AXS LLC, 2019); data reduction: SAINT V8.40B (Bruker AXS LLC, 2019); program(s) used to solve structure: SHELXT2018/2 (Sheldrick, 2015); program(s) used to refine structure: SHELXL2019/1 (Sheldrick, 2019); molecular graphics: ORTEP for Windows (Farrugia, 2012); software used to prepare material for publication: WinGX publication routines (Farrugia, 2012).

### ***Photophysical characterization***

Ultraviolet–visible spectra (UV–Vis) of the liquid samples were obtained by a JASCO V-650 spectrometer. The emission spectra were carried out using an Edinburgh FS5 spectrofluorometer. The samples were placed into quartz cells of 1 cm path length. Compound concentrations were fixed as indicated.

Absolute fluorescence quantum yields were measured by using an Edinburgh FS5 spectrofluorometer with a SC-30 integration sphere module. The absolute method requires two measurements; the number of absorbed photons and the number of the emitted photons. The number of absorbed photons of a sample is determined by the

reduction of the light scatter compared to a blank measurement. The quantum yield calculation is made using a wizard within the operating software.

The UC emission, UC quantum yield and photostability of **BDP-Br** were measured with a Perkin Elmer FL-6500 spectrometer at room temperature ( $295 \pm 2$  K) and the emission spectra were corrected for the wavelength-dependent sensitivity of the instrument.

### ***Laser flash photolysis***

Two different setups were used for laser flash photolysis (LFP) experiments.

*Setup from the Mainz team:* An LP980KS setup from Edinburgh Instruments equipped with an Nd:YAG-laser from Quantel (Q-smart 450) was used for laser flash photolysis to record transient absorption and emission signals. The frequency-doubled output with a wavelength of 532 nm, a pulse duration of  $\sim 10$  ns, a frequency of 10 Hz and a typical energy of  $\sim 12$  mJ served as the excitation source. A constant laser output energy is highly important for quantitative measurements like the intersystem crossing quantum yield determination. Hence, pulse energies were unchanged for each series of experiments and control measurements established the laser output stability. A beam expander (Thorlabs) was used to ensure homogeneous excitation in the detection volume. Detection of transient absorption spectra occurred on an iCCD camera from Andor. Single-wavelength kinetics were recorded using a photomultiplier tube from Hamamatsu (R928). The spectroscopic experiments were performed using a cuvette holder that allows temperature control. If not stated otherwise the LFP measurements were performed at 293 K and the transient absorption spectra were integrated over 100 ns.

*Setup from the Valencia team:* Delayed fluorescence quenching experiments were performed by LFP using The LP980-KS Laser Flash Photolysis Spectrometer (from Edinburgh Instruments) which is a combined system for the measurement of laser induced transient absorption, emission kinetics and spectra, with the ability to automatically convert and fully analyse the kinetic and spectral information. The pump is an INDI Quanta-Ray Nd:YAG laser equipped with a primoSCAN BB optical parametric oscillator (OPO) from SPECTRA PHYSICS®. The probe pulse is longer than the recorded time window of a measurement, and a monochromator (TMS302-A, grating  $150$  lines  $\text{mm}^{-1}$ ) disperses the probe light after it passed the sample. The probe light can be then passed on to a PMT detector (spectral S5 range 200–870 nm) to obtain

the temporal resolved picture. All components are controlled by the software L900 provided by Edinburgh.

For our delayed emission measurements, the probe shutter is closed so that no light from the Xe lamp is exciting the sample and the laser is only used as a light source. To photolyze our samples, a 532 nm monowavelength was employed, ensuring that only the **BDP-Br** chromophore absorbs the excited photons. The data have been acquired as an average of several shots to improve the signal-to-noise ratio.

### ***Phosphorescence measurements***

Phosphorescence spectrum was obtained using an Edinburgh FS5 spectrofluorometer with a SC-70 Liquid Nitrogen Dewar module in order to record samples in quartz tubes (4mm ID) under crystalized EtOH at 77K.

### ***Fluorescence lifetime measurements***

The measurements were carried out in a *EasyLife X* Lifetime Fluorescence Spectrometer connected to a temperature control system working with liquid refrigeration. Samples were placed in a 4mL quartz cuvette and irradiated with a 407 nm LED as energy source. The wavelength bellow 475 nm was filtered.

### ***Electrochemical characterization.***

The redox potentials were measured by cyclic voltammetry with an AUTOLAB PGSTAT100 potentiostat. All measurements were made in deaerated acetonitrile containing tetrabutylammonium tetrafluoroborate (0.1 M) as supporting electrolyte, a glassy carbon as working electrode, a platinum wire as counter electrode, a silver wire as pseudo reference and ferrocene (0.01 M) as internal standard. The scan rate was 100 mV·s<sup>-1</sup>. Potentials are reported with respect to the saturated calomel electrode (SCE) as reference.

### ***Upconversion quantum yields***

The quantum yields of the UC system was estimated by the ratio of (integrated) upconverted photons generated relative to the integrated emission of a reference system with a well-known quantum yield. For that, the photoluminescence intensity of a solution containing [Ru(bpy)<sub>3</sub>](PF<sub>6</sub>)<sub>2</sub> ( $\Phi_{Ph} = 0.095$ )<sup>2</sup> in deaerated ACN in the absence of the annihilator was measured under identical conditions as the complete upconversion

---

<sup>2</sup> I. K. Suzuki, A. Kobayashi, S. Kaneko. *et al. Phys. Chem. Chem. Phys.*, **11**, 9850-9860 (2009)

system. Neutral density filter from Newport and Thorlabs were used to attenuate the laser output. Oxygen was removed from the solvent by five freeze-pump-thaw cycles using custom-made Schlenk-cuvettes and argon as an inert gas, liquid N<sub>2</sub> for cooling, and Schlenk line vacuum (down to 0.5 mbar).

***Stern–Volmer quenching experiments.***

Stern–Volmer experiments were conducted to determine the triplet energy transfer rate  $k_{\text{TEnT}}$  of **BDP-Br** to **TBPe** and the quenching rate  $k_q$  of the UC emission with 2-acetyl-5-chlorothiophene according to equation (1), with  $\tau$  as the lifetime,  $F$  as the fluorescence intensity,  $c_q$  as the quencher concentration and  $K_{\text{SV}}$  as the Stern–Volmer constant. The index 0 is used in the absence of quencher.

$$\frac{\tau_0}{\tau} = \frac{F_0}{F} = 1 + \tau_0 \cdot k_q \cdot c_q = 1 + K_{\text{SV}} \cdot c_q \quad (1)$$

Additional steady-state emission quenching experiments were carried out monitoring the **TBPe** emission (excitation wavelength, 405 nm; solvent, neat ACN) in the presence of different 2-acetyl-5-chlorothiophene concentrations. A Perkin Elmer FL-6500 spectrometer was employed for these measurements.

## 2. Synthesis of BDP-Br

The compound **BDP-Br** was synthesized following the methodologies described on the bibliography.<sup>3,4</sup> Thus, the first step was the oxidative addition of 4-fluorothiophenol to the starting 2,3-dimethylpyrrole carboxaldehyde, followed by the condensation of the corresponding trialkylpyrrole with formylpyrrole in methanol in the presence of HBr as a catalyst, next to the corresponding difluoroborate complexes formation. These two steps can be typically found in the literature. Finally, bromide addition can be carried out quantitatively by NBS complex treatment. The different reaction steps are explained as follows:

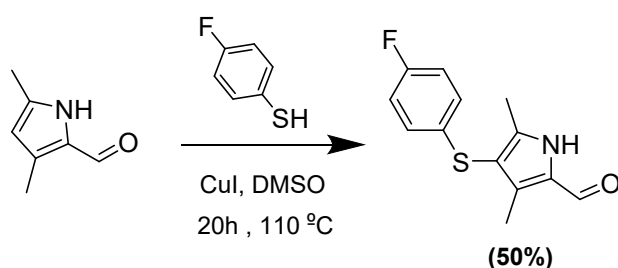

**Synthesis of compound A:** 3,5-Dimethylpyrrole-2-carboxaldehyde (120 mg, 0.97 mmol), 4-fluorothiophenol (1 mL, 9.4 mmol) and CuI (300mg, 0.77 mmol) were mixed in 2mL of DMSO and placed in a round bottom flask under N<sub>2</sub> reflux at 110° C for 20h. The crude was extracted with DCM and the organic phases were washed with brine and water. The mixture was then purified by reverse phase flash column chromatography, using ACN:CH<sub>2</sub>Cl<sub>2</sub> as eluent. Finally, 121 mg of product **5** were obtained (50 %) as a yellow-orange solid. <sup>1</sup>H NMR (400 MHz, CDCl<sub>3</sub>) δ (s, 1H) 9.59, (s, 1H) 9.49, (m, 4H) 6.97-6.92, (s, 3H) 2.32, (s,3H) 2.28.

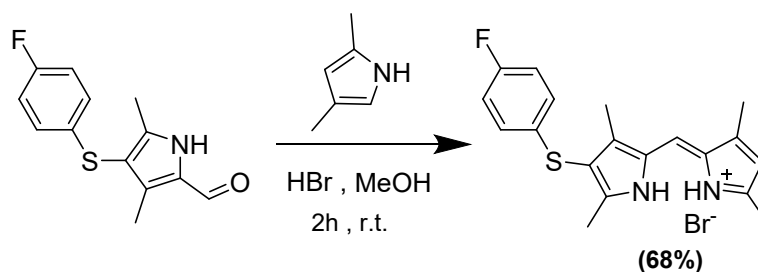

<sup>3</sup> Yutanova, S.L., Berezin, M.B., Semeikin, A.S. *et al.* *Russ J Gen Chem* **83**, 545–551

<sup>4</sup> Antina, E.V., Berezin, M.B., Dudina, N.A. *et al.* *Russ. J. Inorg. Chem.* **59**, 1187–1194 (2014)



**Synthesis of compound B:** To a solution of 1.2 g (12.6 mmol) of 2,4-dimethylpyrrole and 1.55 g (12.6 mmol) of **5** in 20 ml of methanol, 2 ml of HBr (conc.) were added. The mixture was stirred for 2 h at room temperature, the precipitate was filtered off, washed with cold methanol, and dried with vacuum at room temperature. 2.5 g of product **6** were obtained (68 %).  $^1\text{H NMR}$  (400 MHz,  $\text{CDCl}_3$ )  $\delta$  (s, 1H) 13.52, (s, 1H) 13.44, (s, 1H) 7.18, (m, 4H) 7.00-6.94, (s, 1H) 6.25, (s, 3H) 2.74, (s, 3H) 2.70, (s, 3H) 2.38, (s, 3H) 2.37.  $^{13}\text{C NMR}$  (101 MHz,  $\text{CDCl}_3$ )  $\delta$  162.7, 160.2, 158.9, 157.7, 148.9, 148.1, 131.7, 128.5, 128.5, 127.9, 125.8, 120.8, 118.9, 118.0, 116.6, 116.4, 14.9, 13.3, 12.4, 11.3

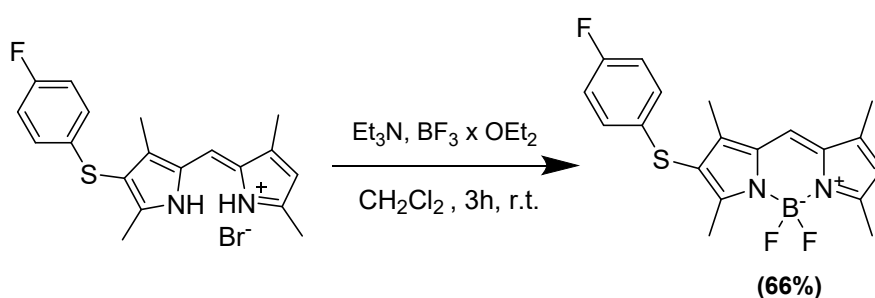

**Synthesis of compound BDP:** A solution of 0.125 g (0.32 mmol) of **6** in 40 ml of methylene chloride was stirred at room temperature. Then, 420 mL (3.2 mmol) of triethylamine were added and immediately 370 mL (3.2 mmol) of boron trifluoride etherate were also added. The mixture was stirred for 3 h, then washed 3 times with water, the organic layer was separated and evaporated to dryness on a rotary evaporator at a reduced pressure. The solid residue was purified by flash column chromatography using methylene chloride as eluent. The eluate was evaporated, the complex was precipitated with methanol, filtered, and dried by vacuum, obtaining 86 mg of product **BDP** (66%).  $^1\text{H NMR}$  (400 MHz,  $\text{CDCl}_3$ )  $\delta$  (s, 1H) 7.14, (m, 2H) 7.04-7.01, (m, 2H) 6.95-6.90, (s, 1H) 6.14, (s, 3H) 2.57, (s, 3H) 2.55, (s, 3H) 2.29, (s, 3H) 2.26.  $^{13}\text{C NMR}$  (101 MHz,  $\text{CDCl}_3$ )  $\delta$  162.4, 160.2, 159.9, 158.4, 144.2, 143.7, 134.8, 132.9, 132.8, 131.9, 128.0, 127.9, 120.8, 120.8, 120.6, 117.8, 116.3, 116.1, 15.1, 12.9, 11.5, 10.6.  $^{19}\text{F NMR}$  (376 MHz,  $\text{CDCl}_3$ )  $\delta$  (s, 1F) -117.6, (d, 1F) -146.2--146.3, (d, 1F) -146.3--146.4.  $^{11}\text{B NMR}$  (128 MHz,  $\text{CDCl}_3$ )  $\delta$  (t, 1B) 1.07, 0.81, 0.56.

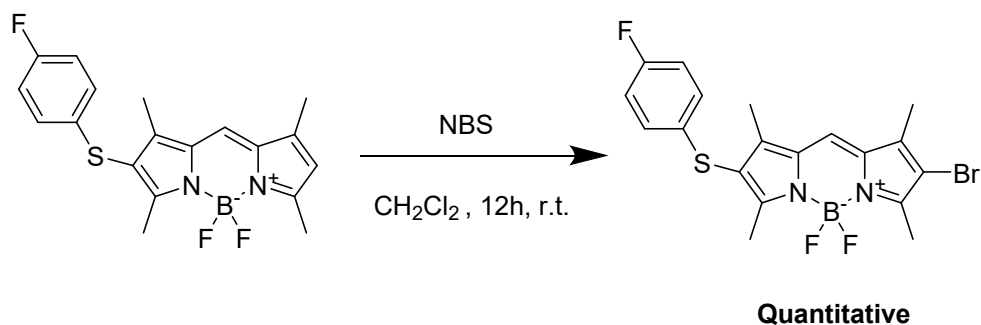

**Synthesis of compound BDP-Br.** To a solution of 0.338 g (1 mmol) of compound **BDP** in methylene chloride (100 mL) which was being stirred at room temperature, 0.024 g (1 mmol) of NBS were slowly added. The solution was then stirred in dark for 12h at room temperature. The reaction crude was washed with water (100mL) and the water phase was extracted with dichloromethane (50 mL x 3). The organic phase was both combined and dehydrated over anhydrous MgSO<sub>4</sub>. After evaporation of the solvent in vacuum, the residue was purified by silica gel column chromatography, using methylene chloride/hexane, 1:1 as eluent. 0.409 g of product **BDP-Br** were obtained, yielding full conversion of the reagent. <sup>1</sup>H NMR (400 MHz, CDCl<sub>3</sub>) δ (s, 1H) 7.15, (m, 2H) 7.06-7.02, (m, 2H) 6.96-6.92, (s, 3H) 2.59, (s, 3H) 2.55, (s, 3H) 2.28, (s, 3H) 2.25. <sup>13</sup>C NMR (101 MHz, CDCl<sub>3</sub>) δ 162.4, 160.2, 160.0, 158.4, 144.2, 143.7, 134.8, 132.9, 132.8, 131.9, 128.0, 127.9, 120.8, 120.8, 120.6, 117.8, 116.3, 116.1, 15.1, 12.9, 11.5, 10.7. <sup>19</sup>F NMR (376 MHz, CDCl<sub>3</sub>) δ -117.0, -146.1, -146.2, -146.3, -146.4. <sup>11</sup>B NMR (128 MHz, CDCl<sub>3</sub>) δ 0.91, 0.66, 0.41.

### 3. Crystallographic data

X-Ray structure of **BDP**: crystallographic data have been deposited with the Cambridge Crystallographic Data Centre (CCDC 2236116).

#### Crystal data and structure refinement for **BDP**

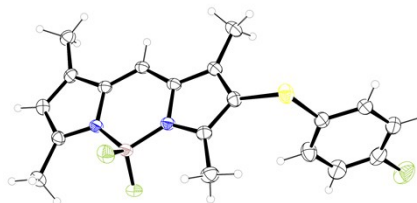

|                                                                   |                                                                  |
|-------------------------------------------------------------------|------------------------------------------------------------------|
| Chemical formula                                                  | C <sub>19</sub> H <sub>18</sub> BF <sub>3</sub> N <sub>2</sub> S |
| Mr                                                                | 374.22                                                           |
| Crystal system, space group                                       | Triclinic, P-1                                                   |
| Temperature (K)                                                   | 250                                                              |
| a, b, c (Å)                                                       | 7.3747 (4), 8.7258 (4), 13.7648 (7)                              |
| α, β, γ (°)                                                       | 80.5679 (15), 82.5851 (15), 86.1805 (15)                         |
| V (Å <sup>3</sup> )                                               | 865.55 (8)                                                       |
| Z                                                                 | 2                                                                |
| Radiation type                                                    | Mo Kα                                                            |
| μ (mm <sup>-1</sup> )                                             | 0.22                                                             |
| Crystal size (mm)                                                 | 0.19 × 0.14 × 0.07                                               |
| Data collection                                                   |                                                                  |
| Diffractometer                                                    | Bruker D8 VENTURE PHOTON III-14                                  |
| Absorption correction                                             | Multi-scan BRUKER SADABS2016/2                                   |
| Tmin, Tmax                                                        | 0.926, 0.959                                                     |
| No. of measured, independent and observed [I > 2σ(I)] reflections | 29732, 3806, 3265                                                |
| Rint                                                              | 0.029                                                            |
| (sin θ/λ) <sub>max</sub> (Å <sup>-1</sup> )                       | 0.641                                                            |
| Refinement                                                        |                                                                  |
| R[F <sup>2</sup> > 2σ(F <sup>2</sup> )], wR(F <sup>2</sup> ), S   | 0.037, 0.104, 1.04                                               |
| No. of reflections                                                | 3806                                                             |
| No. of parameters                                                 | 239                                                              |
| H-atom treatment                                                  | H-atom parameters constrained                                    |
| Δρ <sub>max</sub> , Δρ <sub>min</sub> (e Å <sup>-3</sup> )        | 0.25, -0.24                                                      |

X-Ray structure of **BDP-Br**: crystallographic data have been deposited with the Cambridge Crystallographic Data Centre (CCDC 2236113).

Crystal data and structure refinement for **BDP-Br**

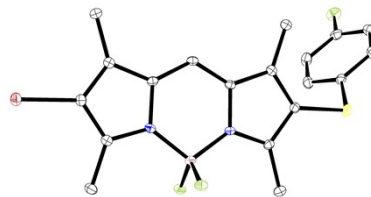

|                                                                            |                                          |
|----------------------------------------------------------------------------|------------------------------------------|
| Chemical formula                                                           | $C_{19}H_{17}BBrF_3N_2S$                 |
| Mr                                                                         | 453.12                                   |
| Crystal system, space group                                                | Triclinic, P-1                           |
| Temperature (K)                                                            | 100                                      |
| a, b, c (Å)                                                                | 16.7902 (17), 16.9670 (16), 17.0009 (15) |
| $\alpha, \beta, \gamma$ (°)                                                | 117.894 (3), 101.580 (4), 107.565 (4)    |
| V (Å <sup>3</sup> )                                                        | 3729.8 (6)                               |
| Z                                                                          | 8                                        |
| Radiation type                                                             | Mo K $\alpha$                            |
| $\mu$ (mm <sup>-1</sup> )                                                  | 2.35                                     |
| Crystal size (mm)                                                          | 0.11 × 0.07 × 0.02                       |
| Data collection                                                            |                                          |
| Diffractometer                                                             | Bruker D8 VENTURE PHOTON III-14          |
| Absorption correction                                                      | Multi-scan                               |
| BRUKER SADABS2016/2                                                        |                                          |
| Tmin, Tmax                                                                 | 0.818, 0.888                             |
| No. of measured, independent and observed [ $I > 2\sigma(I)$ ] reflections | 199984,<br>20090, 15203                  |
| Rint                                                                       | 0.086                                    |
| (sin $\theta/\lambda$ )max (Å <sup>-1</sup> )                              | 0.685                                    |
| Refinement                                                                 |                                          |
| R[F <sup>2</sup> > 2 $\sigma$ (F <sup>2</sup> )], wR(F <sup>2</sup> ), S   | 0.038, 0.084, 1.03                       |
| No. of reflections                                                         | 20090                                    |
| No. of parameters                                                          | 991                                      |
| H-atom treatment                                                           | H-atom parameters constrained            |
| $\Delta\rho_{max}, \Delta\rho_{min}$ (e Å <sup>-3</sup> )                  | 0.81, -0.46                              |

#### 4. Photophysical and photochemical properties

##### *UV-Vis and emission spectra*

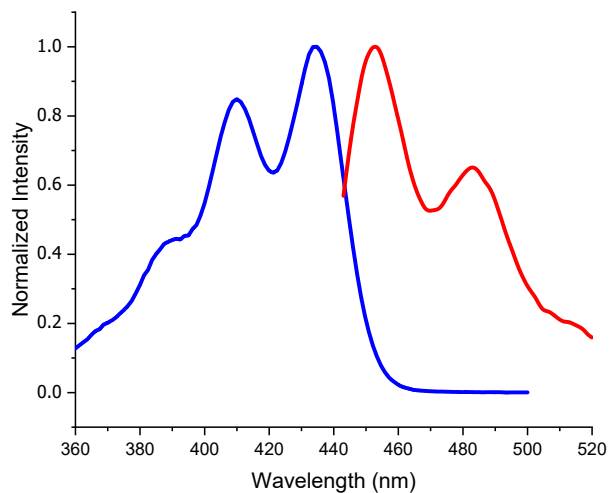

**Figure S3.** Normalized UV-Vis (blue) and emission (red) spectra of 10  $\mu$ M solution of **TBPe** in ACN.

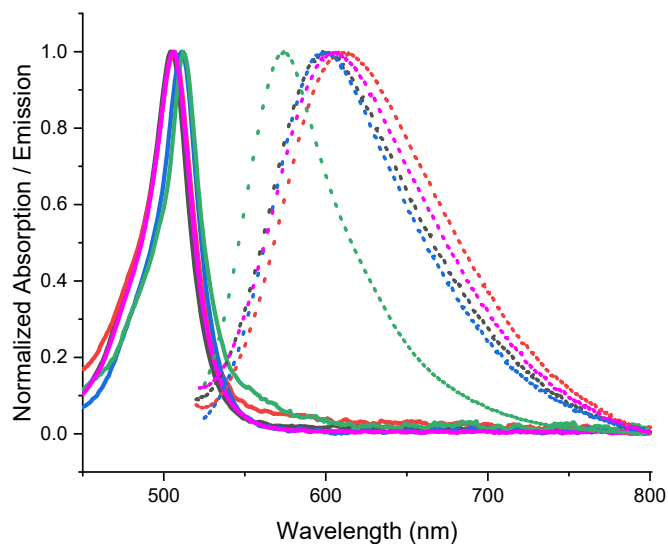

**Figure S4.** Normalized UV-Vis (left lines) and emission (right dashed lines) spectra of 18  $\mu$ M sensitizer **BDP** in different solvents. Black: Methanol; Red: DMSO; Blue: Dichloromethane; Green: Hexane, Violet: DMA.

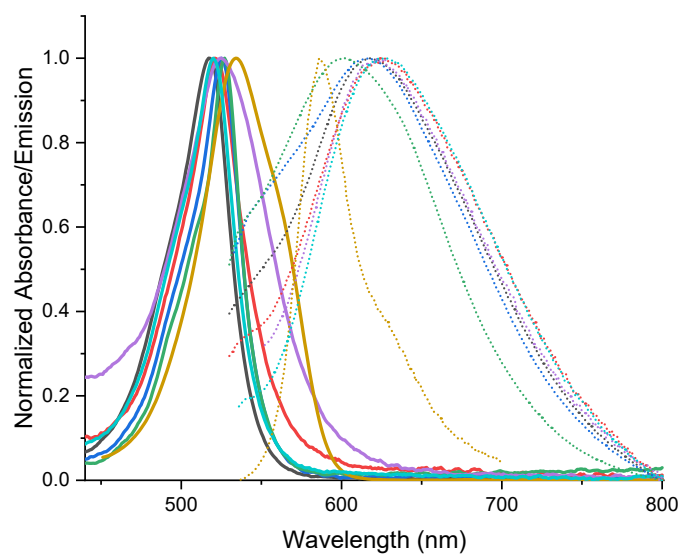

**Figure S5.** UV-Vis (left lines) and emission (right dashed lines) spectra of 15  $\mu\text{M}$  sensitizer **BDP-Br** in different solvents. Black: MeOH; Red: DMSO; Blue:  $\text{CH}_2\text{Cl}_2$ , Green: Hexane, Orange: ACN, Violet: DMA, Blue: ACN/DMA 4:1

*Phosphorescence spectrum*

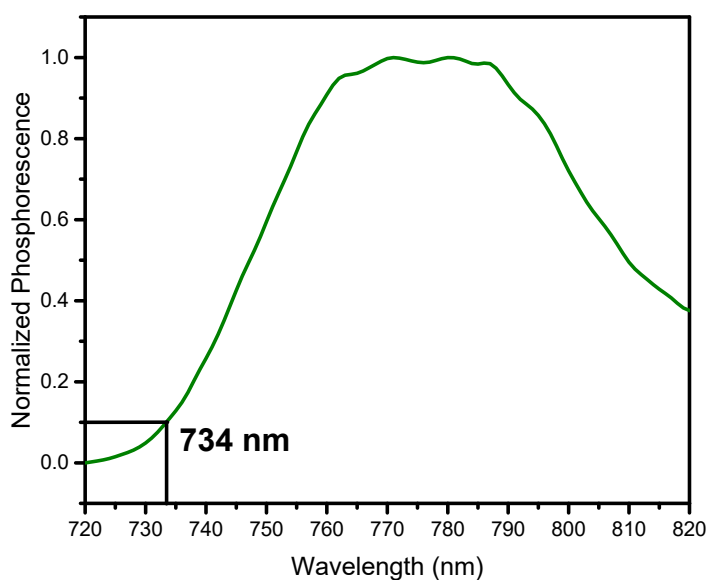

**Figure S6.** Emission spectra of **BDP-Br** as a 1 mM solution in crystallized EtOH matrix at 77 K. With 20nm of emission slit.

### Absolute fluorescence quantum yield measurements

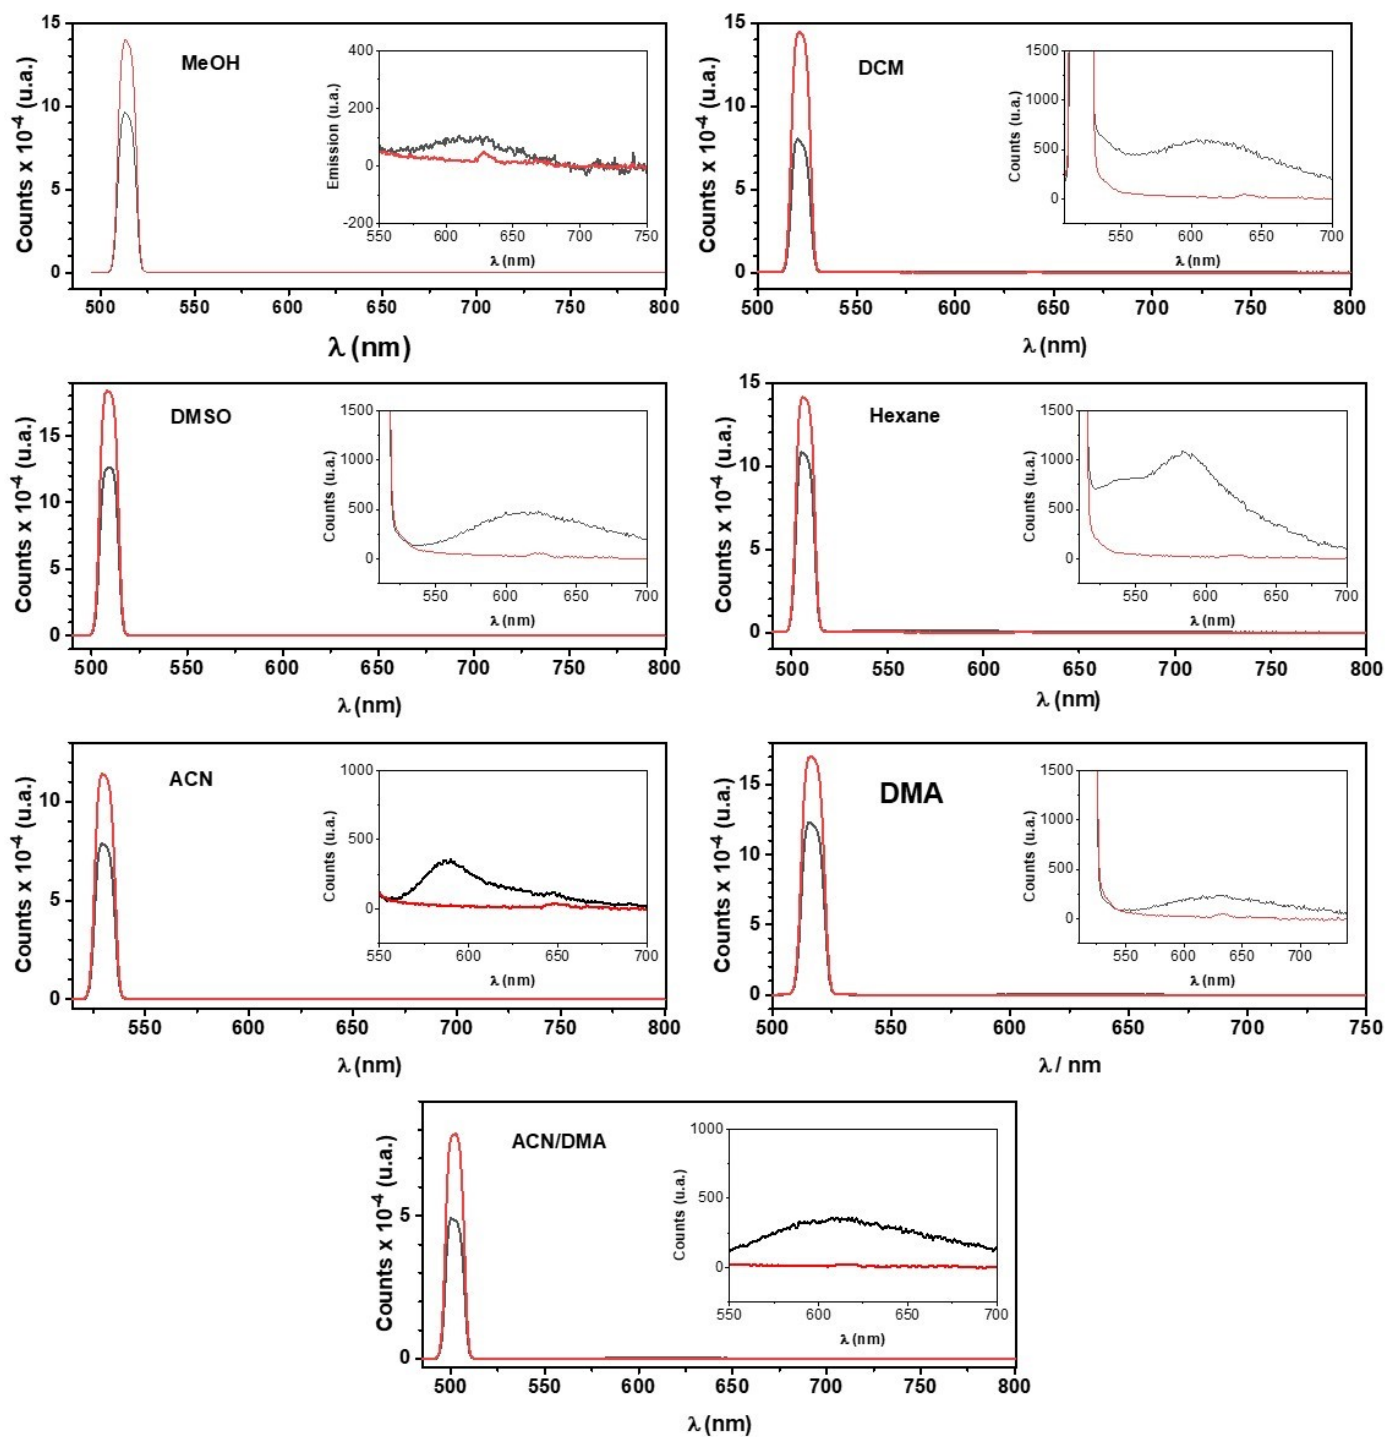

**Figure S7.** Measurements of absolute fluorescence quantum yield of 17  $\mu\text{M}$  solution of **BDP-Br** in different solvents. The scatter of the solvent is shown in red and the scatter and emission of the **BDP-Br** in black.

**Table S1. Photophysical properties of BDP**

| Solvent       | <sup>a</sup> $\lambda_{\text{max.abs}}$ | <sup>a</sup> $\lambda_{\text{max.em}}$ | <sup>b</sup> $\epsilon$ | <sup>c</sup> $\Delta\bar{\nu}$ | <sup>d</sup> $E_S$ | <sup>e</sup> $\phi_F$ | <sup>f</sup> $\tau_F$ | <sup>g</sup> $k_F$ |
|---------------|-----------------------------------------|----------------------------------------|-------------------------|--------------------------------|--------------------|-----------------------|-----------------------|--------------------|
| MeOH          | 502                                     | 601                                    | 21675                   | 3281                           | 2.33               | 0.13                  | 2.6                   | $5.0 \times 10^7$  |
| DMSO          | 506                                     | 610                                    | 19440                   | 3369                           | 2.29               | 0.10                  | 2.6                   | $3.9 \times 10^7$  |
| DCM           | 511                                     | 600                                    | 13000                   | 2903                           | 2.30               | 0.26                  | 3.7                   | $6.9 \times 10^7$  |
| Hexane        | 512                                     | 575                                    | 23730                   | 2140                           | 2.32               | 0.40                  | 6.2                   | $6.4 \times 10^7$  |
| DMA           | 505                                     | 603                                    | 42500                   | 3214                           | 2.19               | 0.10                  | 2.3                   | $4.4 \times 10^7$  |
| ACN           | 500                                     | 604                                    | 22222                   | 3253                           | 2.10               | 0.15                  | 2.3                   | $6.5 \times 10^7$  |
| ACN/DMA (4:1) | 505                                     | 603                                    | 12833                   | 3382                           | 2.35               | 0.12                  | 2.3                   | $5.3 \times 10^7$  |

<sup>a</sup> Maximum absorption/emission peak (in nm); <sup>b</sup> Molar extinction coefficient (in  $\text{M}^{-1}\text{cm}^{-1}$ ); <sup>c</sup> Stokes shifts (in  $\text{cm}^{-1}$ ); <sup>d</sup> Singlet energy (in eV); <sup>e</sup> Absolute fluorescence quantum yield; <sup>f</sup> Singlet lifetime (in ns); <sup>g</sup> Fluorescence rate constant (in  $\text{s}^{-1}$ ).

### Time-resolved fluorescence spectra

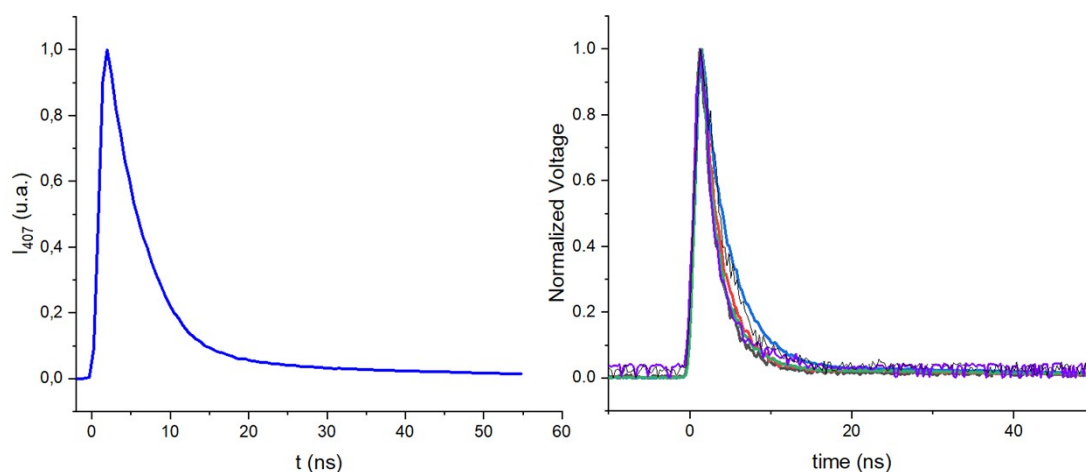

**Figure S8.** *Left:* Fluorescence decay trace of 1 mM **TBPe** solution in a mixture of ACN/DMA 4:1. *Right:* Fluorescence decay trace of 10  $\mu\text{M}$  **BDP-Br** solutions in different solvents. Green: DCM; Blue: Hexane; Violet: ACN; Black: DMA; Orange: ACN/DMA (4:1) Red: DMSO.



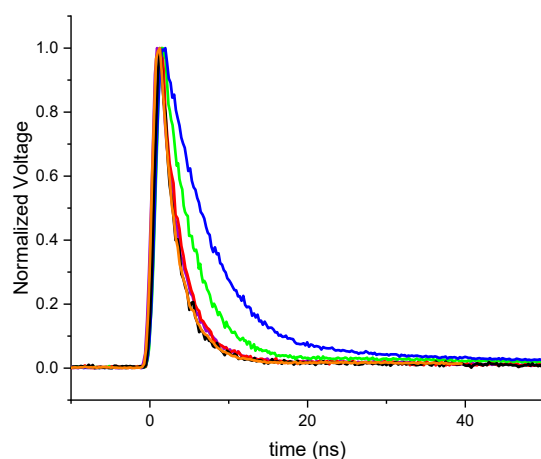

**Figure S9.** Fluorescence decay trace of 10  $\mu\text{M}$  BDP solutions in different solvents. Green: DCM; Blue: Hexane; Violet: ACN; Black: DMA; Orange: ACN/DMA (4:1) Red: DMSO.

### Photostability measurements

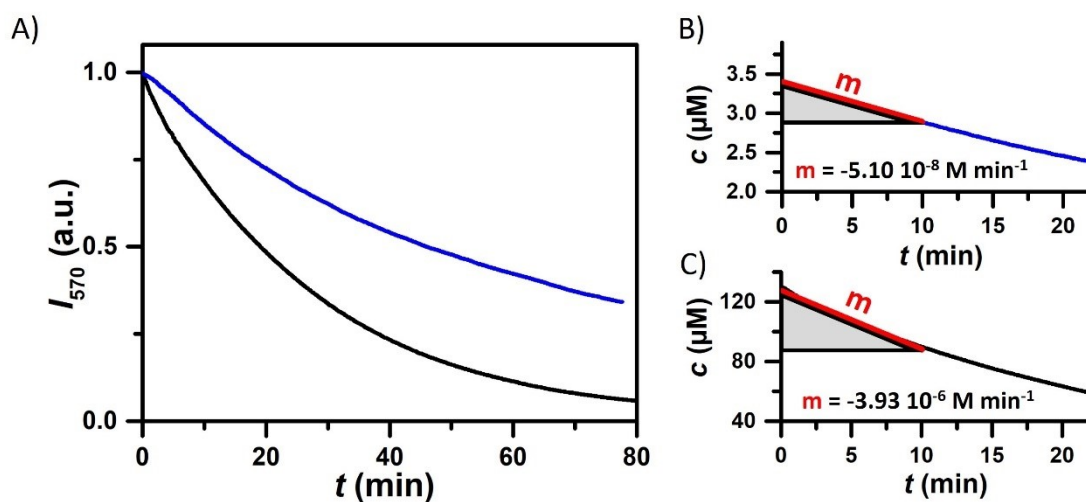

**Figure S10.** A) Photostability measurements of 3.38  $\mu\text{M}$  BDP-Br (blue) and 120  $\mu\text{M}$   $[\text{Ru}(\text{bpy})_3](\text{PF}_6)_2$  (black) in deaerated MeCN. A 514 nm cw laser was used as excitation source (100 mW) and the luminescence was recorded at 570 nm. B) and C) BDP-Br (blue) and  $[\text{Ru}(\text{bpy})_3](\text{PF}_6)_2$  (black) concentration (obtained from weight-in concentrations and the relative emission signals) plotted against irradiation time. The first 10 min of irradiation were used to quantify the sensitizer photo-degradation.

The photostability of **BDP-Br** was measured against the well-described Ru-complex  $[\text{Ru}(\text{bpy})_3](\text{PF}_6)_2$  under identical excitation conditions (same absorption at excitation wavelength). Two 3 mL solutions of **BDP-Br** and  $[\text{Ru}(\text{bpy})_3](\text{PF}_6)_2$  in deaerated ACN were irradiated with a 514 nm cw laser over a period of 80 min. A very similar photostability assay has been used recently for the estimation of relative photodegradation quantum yields.<sup>5,6,7</sup> The luminescence as concentration-proportional observable was recorded at 570 nm using the FL-6500 instrument. Under the assumption that the photodegradation products do not emit at the selected detection wavelength (570 nm) the relative emission intensity reflects the relative concentration of the remaining sensitizer. The absence of emissive degradation products has been observed for  $[\text{Ru}(\text{bpy})_3]^{2+}$  upon green illumination<sup>8</sup> and control experiments allowed us to rule out contributions of photodegradation products resulting from **BDP-Br**. A linear fit of the first 10 min of irradiation allows for an estimate of the degradation constant. We obtained a slope  $m$  of  $3.93 \cdot 10^{-6} \text{ M min}^{-1}$  for  $[\text{Ru}(\text{bpy})_3](\text{PF}_6)_2$  and  $5.1 \cdot 10^{-8} \text{ M min}^{-1}$  for **BDP-Br**, which is roughly two orders of magnitude slower.

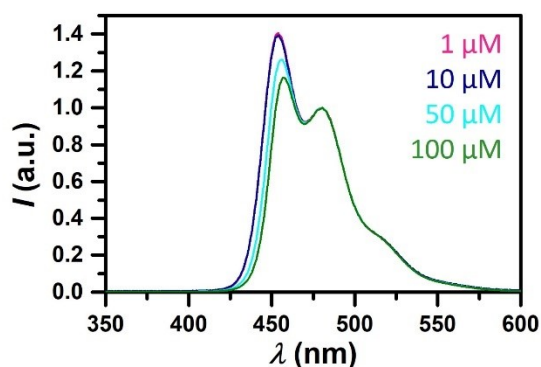

**Figure S11.** Spectral emission of **TBPe** at different concentrations after excitation with 355 nm laser pulses in ACN. The emission was normalized at 480 nm where no filter effects are observed.

<sup>5</sup> Björn Pfund, Debora M. Steffen, Mirjam R. Schreier, *et. al.* *J. Am. Chem. Soc.* **142**, 23, 10468–10476 (2020)

<sup>6</sup> Jakob B. Bilger, Christoph Kerzig, Christopher B. Larsen, and Oliver S. Wenger, *J. Am. Chem. Soc.* **143**, 3, 1651–1663 (2021)

<sup>7</sup> Lucius Schmid, Christoph Kerzig, Alessandro Prescimone, and Oliver S. Wenger, *ACS Au*, **1**, 6, 819–832 (2021)

<sup>8</sup> Robert Naumann, Christoph Kerzig and Martin Goez, *Chem. Sci.*, **8**, 7510-7520 (2017)

## 5. Cyclic voltammetry

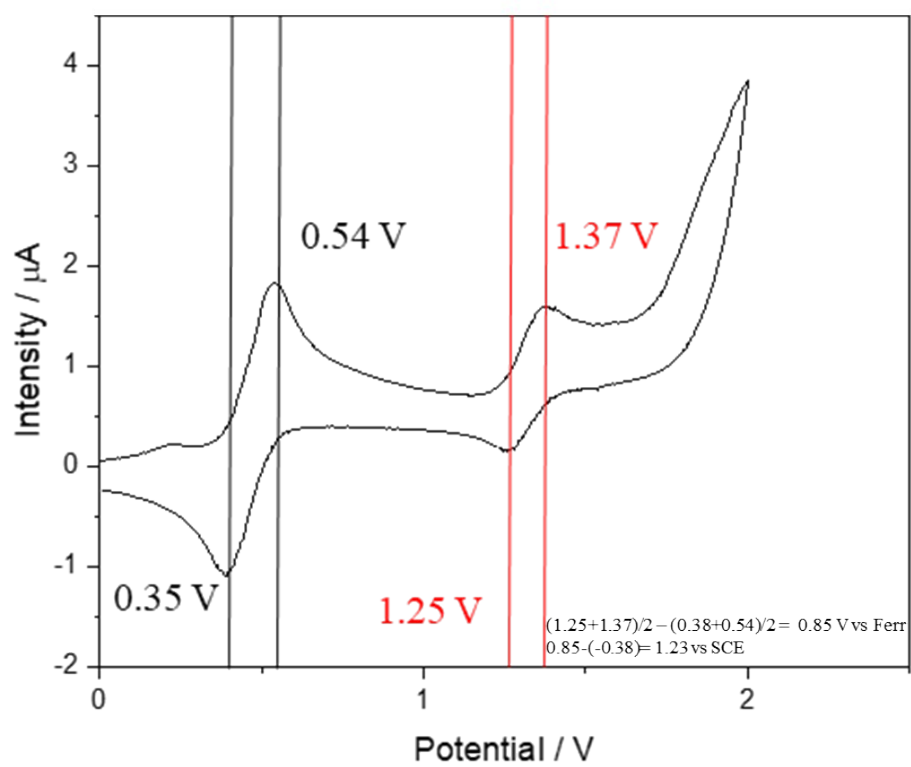

**Figure S12.** Cyclic voltammogram of 1mM **BDP-Br** in ACN solution.

## 6. Coupling reactions

### The Meerwein-type reaction

Table S2. Optimization for the model reaction

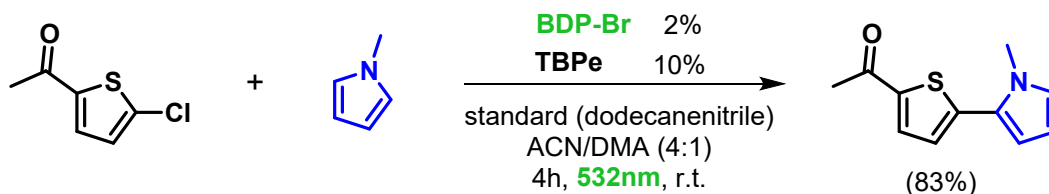

| Entry | Solvent       | Irradiation time (h) | Trapping equivalents | <b>BDP-Br/TBPe</b> (% mol) | Yield (%)       |
|-------|---------------|----------------------|----------------------|----------------------------|-----------------|
| 1     | ACN           | 18                   | 80                   | 1/5                        | 0 <sup>a</sup>  |
| 2     | ACN           | 2                    | 80                   | 1/5                        | 0 <sup>b</sup>  |
| 3     | ACN           | 2                    | 80                   | 1/5                        | 0 <sup>c</sup>  |
| 5     | ACN           | 3                    | 80                   | 1/5                        | 10 <sup>d</sup> |
| 6     | ACN           | 3                    | 80                   | 1/5                        | 44              |
| 7     | ACN/DMA (4:1) | 3                    | 80                   | 2/10                       | 72              |
| 8     | ACN/DMA (4:1) | 4                    | 80                   | 2/10                       | 80              |
| 9     | ACN/DMA (4:1) | 4                    | 100                  | 2/10                       | <b>83</b>       |

a) Irradiation with LED, b) Reaction without **BDP-Br**, c) Reaction without **TBPe**, d) Using **BDP** as sensitizer.

### 1-(5-(1-Methyl-1H-pyrrol-2-yl)thiophen-2-yl)ethan-1-one

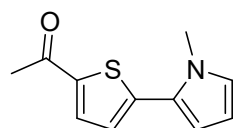

The compound was prepared according to the general procedure described in the main text using 2-acetyl-5-chlorothiophene (4.8 mg, 30  $\mu\text{mol}$ , 1.0 equiv.) as aryl halide and *N*-methylpyrrole (213  $\mu\text{L}$ , 2.4 mmol, 80 equiv.) as trapping agent, dodecanenitrile (6.5  $\mu\text{L}$ , 30  $\mu\text{mol}$ , 1.0 equiv.) as internal standard, TBPe (2.9 mg, 6  $\mu\text{mol}$ , 0.1 equiv.) and **BDP-Br** (0.2 mg, 0.6  $\mu\text{mol}$ , 0.02 equiv.). The reaction mixture was irradiated for 4 hours, obtaining 83% product yield according to CG-FID analysis (73% yield of isolated product as a dark-yellow solid).

**<sup>1</sup>H NMR** (400 MHz, CDCl<sub>3</sub>): δ = 7.62 (d, J = 4.0 Hz, 1H), 7.06 (d, J = 4.0 Hz, 1H), 6.77-6.72 (m, 1H), 6.51 (dd, J = 3.8, 1.8 Hz, 1H), 6.18 (dd, J = 3.8 Hz, 2.7 Hz, 1H), 3.81 (s, 3H), 2.55 (s, 3H). **<sup>13</sup>C NMR** (100 MHz, CDCl<sub>3</sub>): δ = 190.6, 144.0, 141.9, 133.3, 126.9, 126.3, 124.4, 111.7, 108.7, 36.0, 26.7. **GC-MS** (EI): m/z (relative intensity) = 205 (100) [M<sup>+</sup>], 190 (94), 162 (36), 130 (13), 118 (53).

### The Mizoroki-Heck coupling reaction

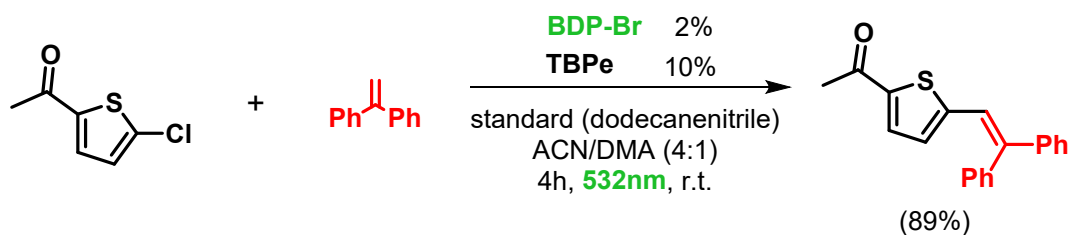

### 1-(5-(2,2-Diphenylvinyl)thiophen-2-yl)ethanone

The compound was prepared according to the general procedure using 5-Bromo-2-Acetylthiophene (4.8 mg, 30 μmol, 1.0 equiv.), 1,1-Diphenylethylene (152 μL, 900 μmol, 30.0 equiv.) as trapping agent, dodecanenitrile (6.5 μL, 30 μmol, 0.1 equiv.) as internal standard, TBPe (2.9 mg, 6 μmol, 0.2 equiv.) and **BDP-Br** (0.2 mg, 0.6 μmol, 0.02 equiv.). The reaction mixture was irradiated for 4 hours, obtaining 89% product according to GC-FID analysis, (85% yield of isolated product as a yellow solid). **<sup>1</sup>H NMR** (400 MHz, CD<sub>3</sub>CN) δ 7.58 – 7.51 (m, 4H), 7.41 (s, 1H), 7.39 – 7.30 (m, 5H), 7.26 (dd, J = 6.7, 2.9 Hz, 2H), 7.08 (d, J = 4.0 Hz, 1H), 2.39 (s, 4H). **<sup>13</sup>C NMR** (101 MHz, CD<sub>3</sub>CN) δ 190.58 (CO), 133.45 (C), 131.52(C), 130.66-130.63 (d, CH), 129.60 (C), 129.47 (CH), 129.14 (C), 127.83 (CH), 121.48 (CH), 26.68 (CH<sub>3</sub>). **GC-MS** (EI): m/z (relative intensity): 304 (100) [M<sup>+</sup>], 289 (50), 228 (40), 202 (13), 152 (10), 43 (16).

### The Photo-Azbusov reaction

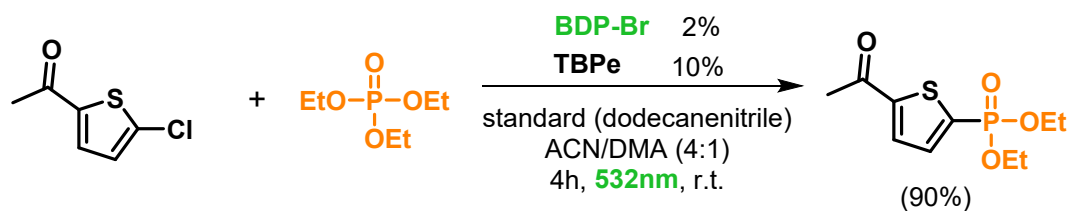

### Diphenyl (5-acetylthiophen-2-yl)phosphonate

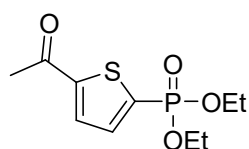

The compound (CAS: 1119779-20-2) was prepared according to the general procedure using 2-acetyl-5-bromothiophene (4.8 mg, 30  $\mu$ mol, 1.0 equiv.), triethylphosphite (45  $\mu$ L, 250  $\mu$ mol, 5 equiv.), dodecanenitrile (6.5  $\mu$ L, 30  $\mu$ mol, 1.0 equiv.) as internal standard, TBPe (2.9 mg, 6  $\mu$ mol, 0.1 equiv.) and **BDP-Br** (0.2 mg, 0.6  $\mu$ mol, 0.02 equiv.). The mixture was irradiated for 4 hours, obtaining 90% of the product according to GC-FID analysis (85% of isolated yield as a yellow oil).

**<sup>1</sup>H NMR** (400 MHz, CDCl<sub>3</sub>)  $\delta$  7.68 (t,  $J$  = 3.3 Hz, 1H), 7.63 (dd,  $J$  = 7.9, 3.7 Hz, 1H), 4.27 – 4.06 (m, 4H), 2.59 (s, 3H), 1.35 (t,  $J$  = 7.1 Hz, 6H) ppm.

**<sup>13</sup>C NMR** (101 MHz, CDCl<sub>3</sub>)  $\delta$  190.6 (C, d,  $J$  = 1.6 Hz), 150.6 (C, d,  $J$  = 7.2 Hz), 136.7 (CH, d,  $J$  = 11.5 Hz), 136.4 (C, d,  $J$  = 203.1 Hz), 132.1 (CH, d,  $J$  = 17.0 Hz), 63.2 (CH<sub>2</sub>, d,  $J$  = 5.5 Hz), 27.3 (CH<sub>3</sub>, s), 16.4 (CH<sub>3</sub>, d,  $J$  = 6.6 Hz) ppm.

**<sup>31</sup>P NMR** (162 MHz, CDCl<sub>3</sub>)  $\delta$  9.61 (s) ppm.

**HRMS** (EI):  $m/z$  (M+H)<sup>+</sup> = calcd. for C<sub>10</sub>H<sub>15</sub>O<sub>4</sub>PS: 263.0501, found: 263.0505.

## 7. $^1\text{H}$ , $^{13}\text{C}$ , $^{11}\text{B}$ and $^{19}\text{F}$ NMR spectra

### $^1\text{H}$ NMR of A

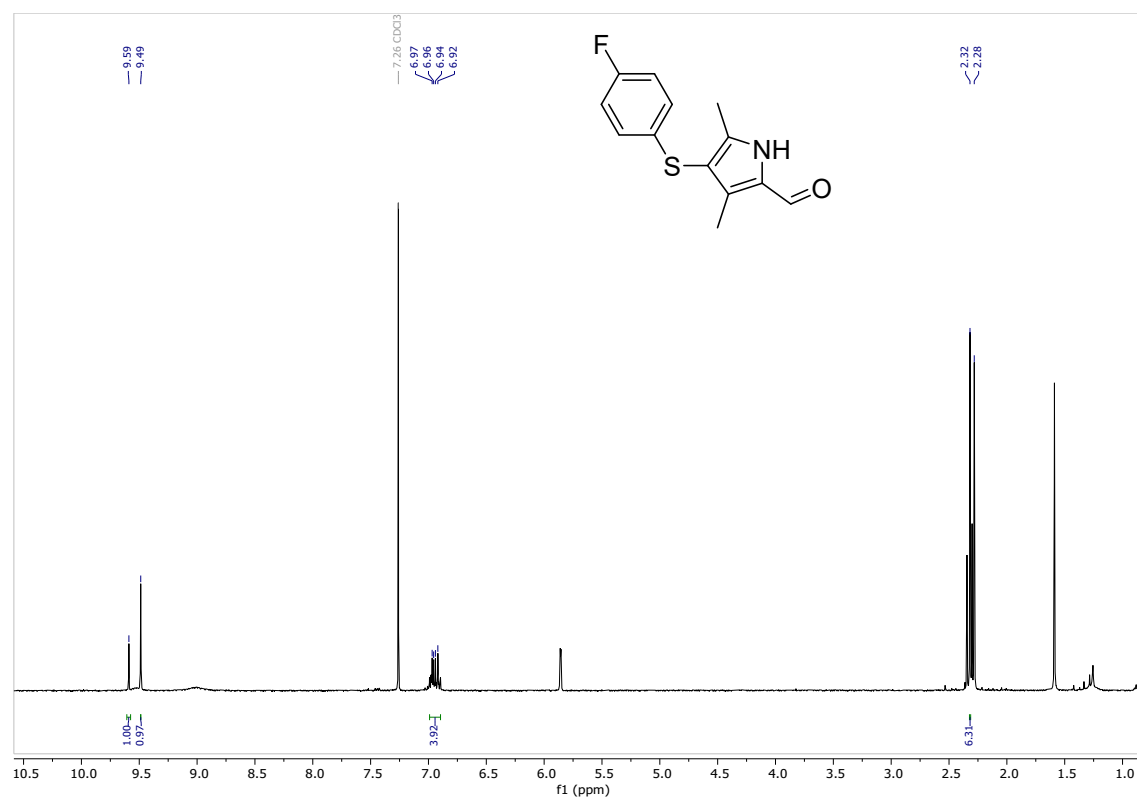

# <sup>1</sup>H NMR of B

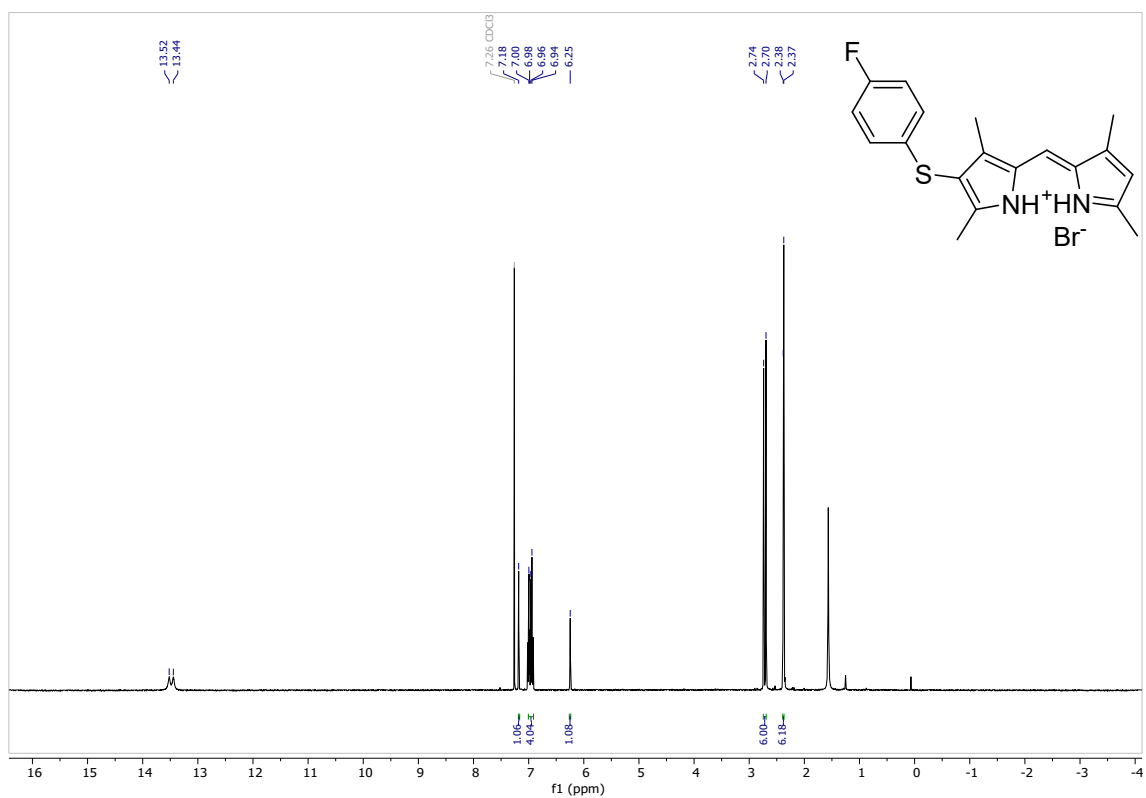

# <sup>13</sup>C NMR B

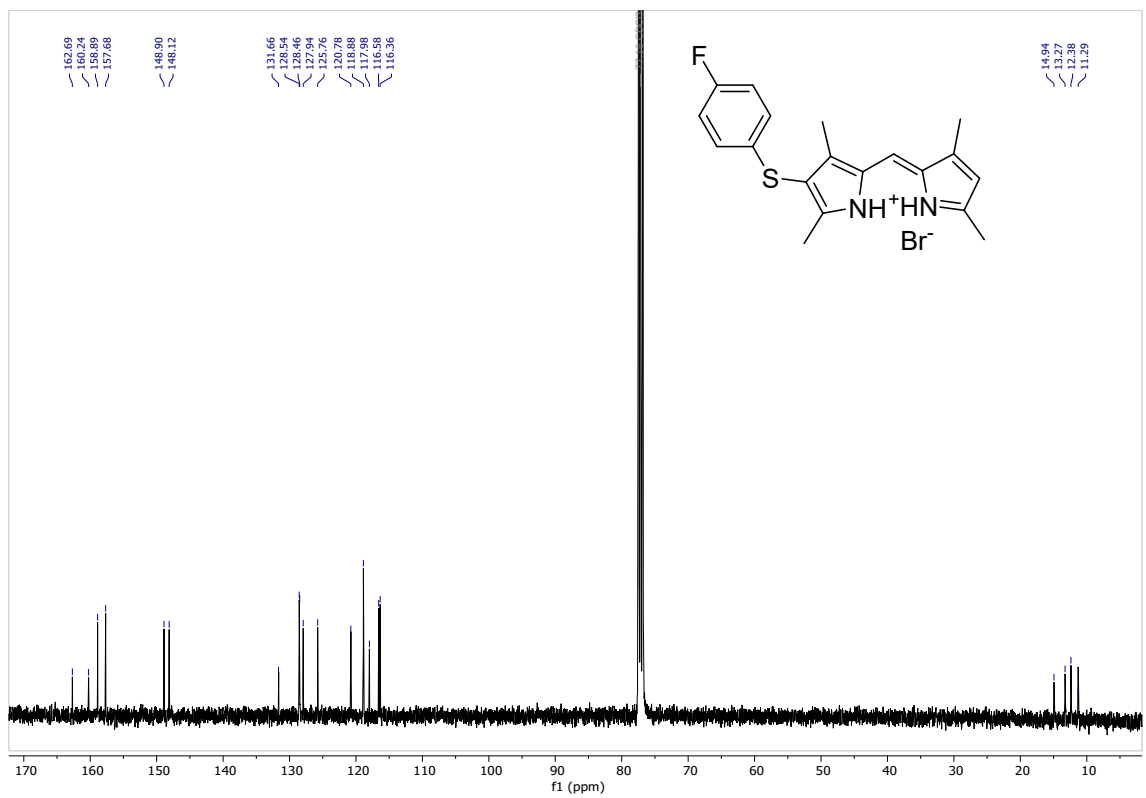



## <sup>1</sup>H NMR of BDP

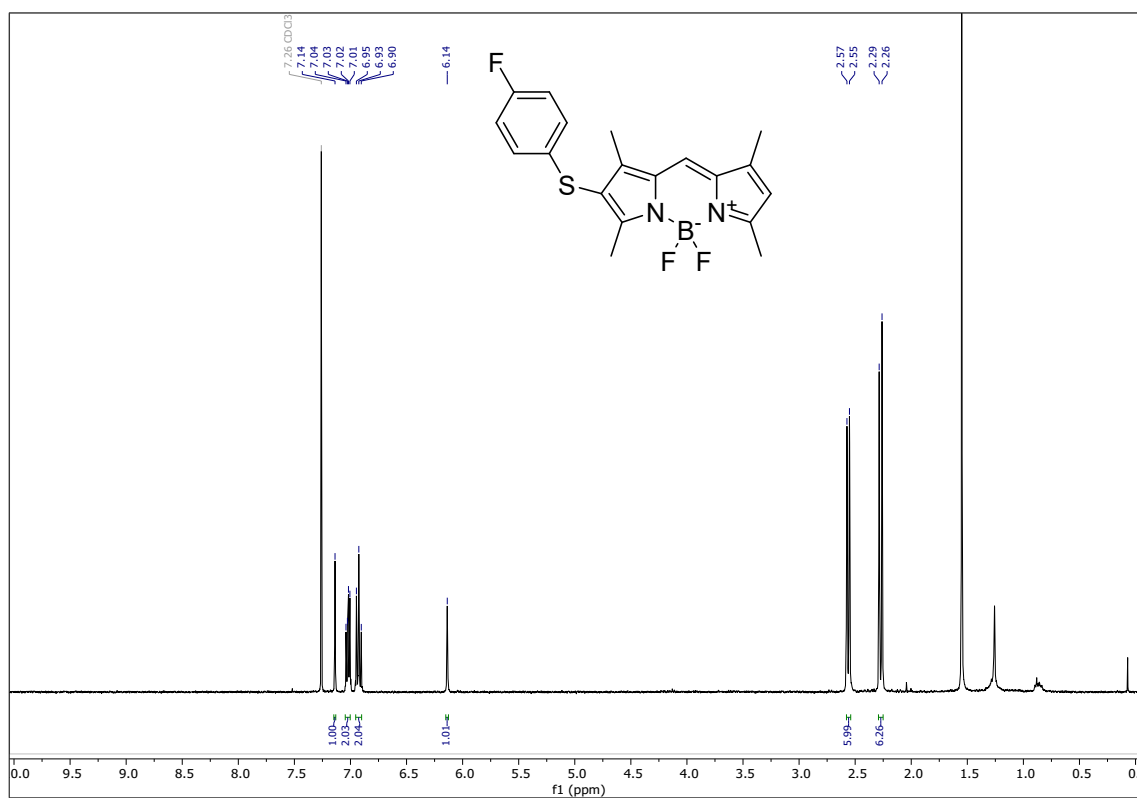

## <sup>13</sup>C NMR of BDP

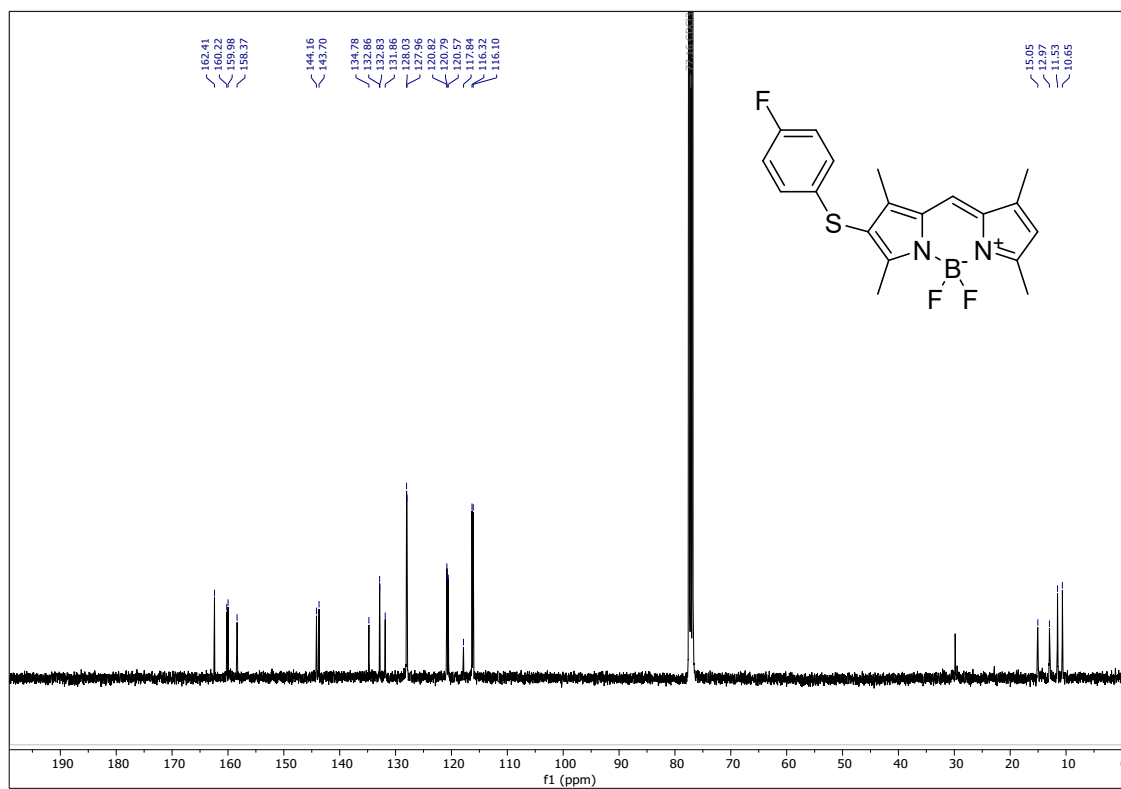

## $^{19}\text{F}$ NMR of BDP

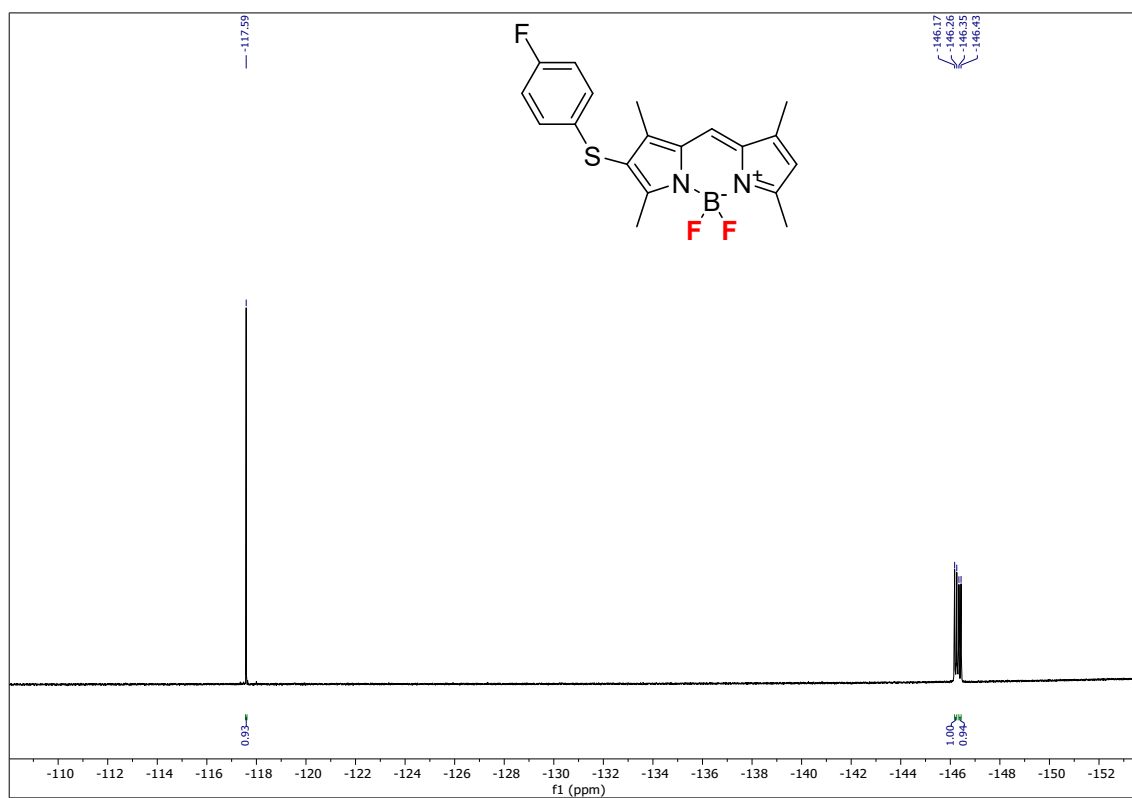

## $^{11}\text{B}$ NMR of BDP

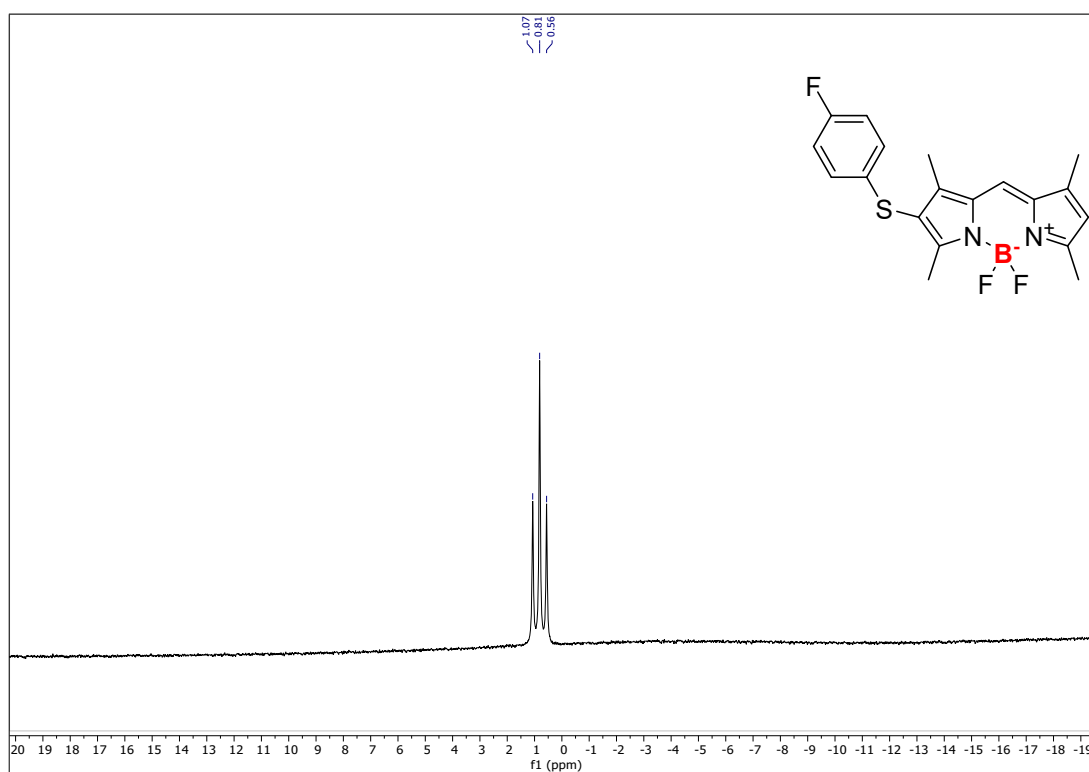

# <sup>1</sup>H NMR of BDP-Br

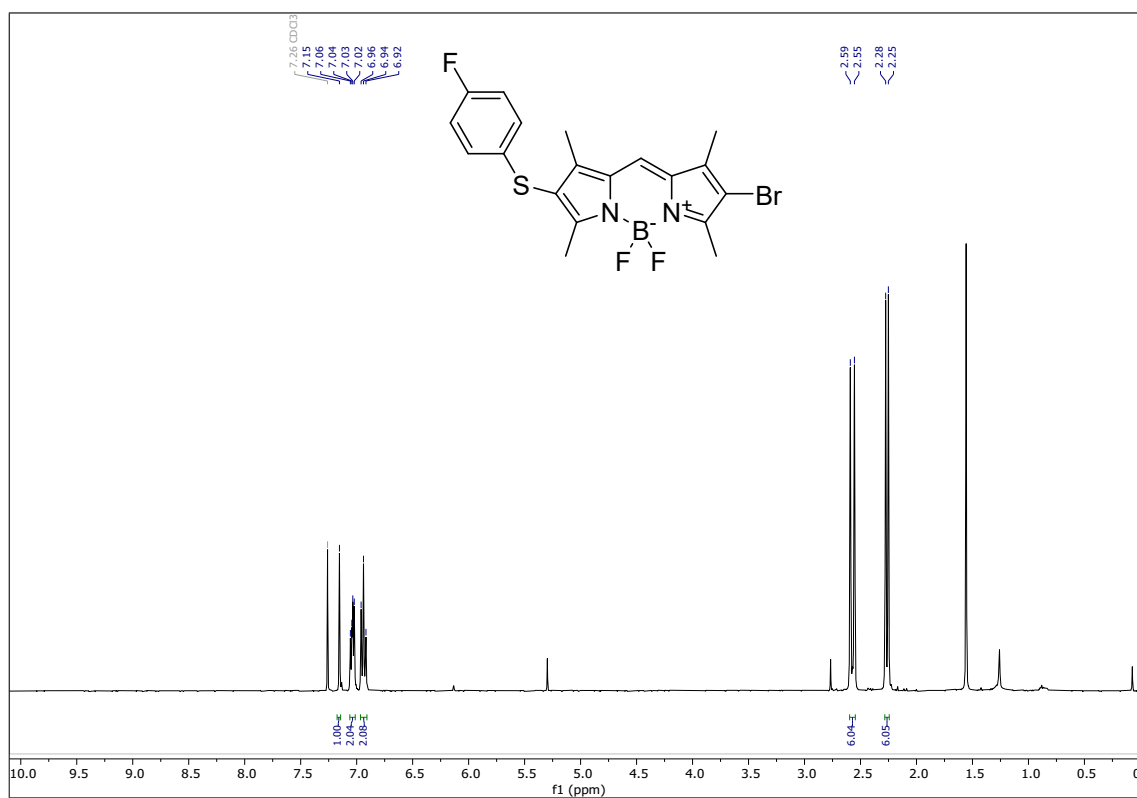

# <sup>13</sup>C NMR of BDP-Br

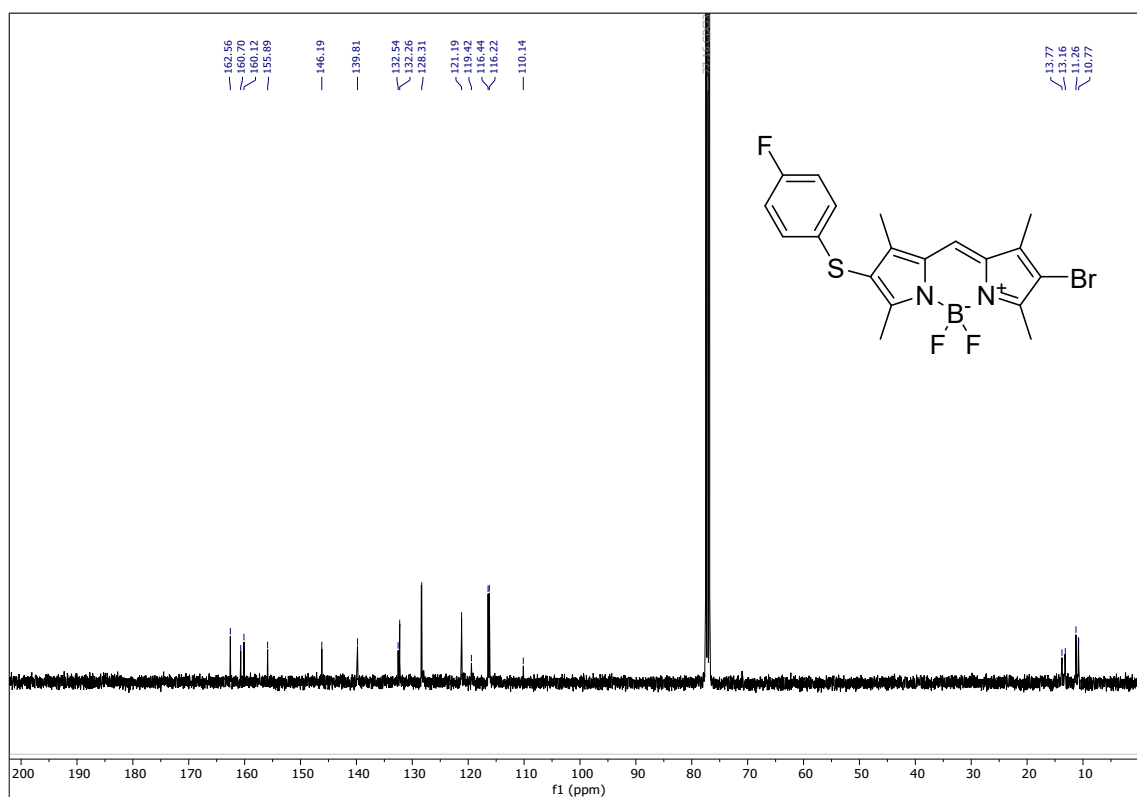

### <sup>19</sup>F NMR of BDP-Br

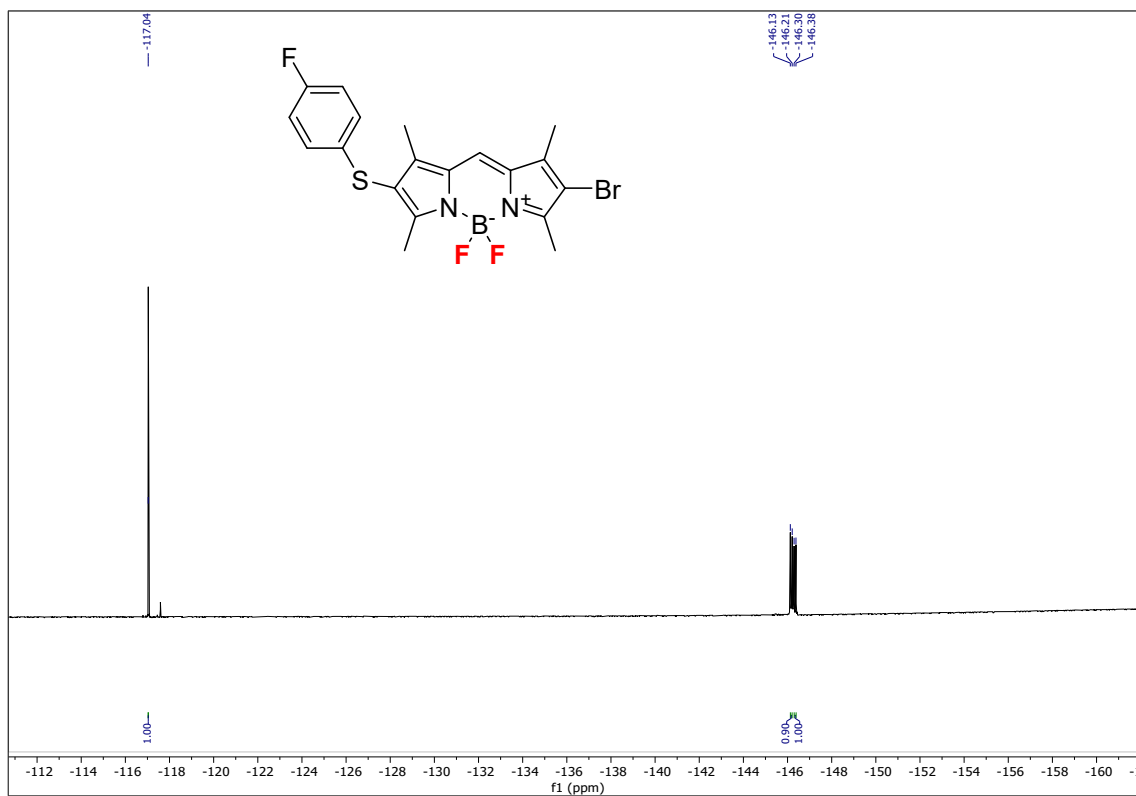

### <sup>11</sup>B NMR of BDP-Br

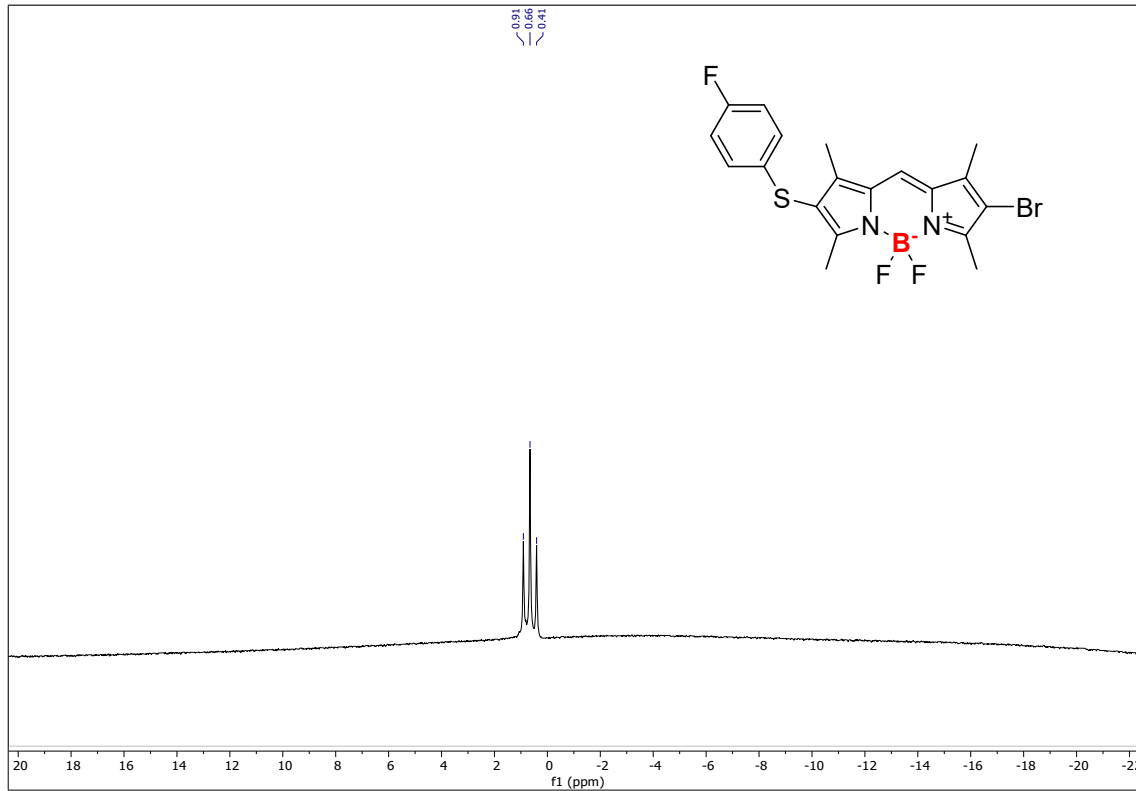

### <sup>1</sup>H NMR of 1-(5-(1-Methyl-1H-pyrrol-2-yl)thiophen-2-yl)ethan-1-one

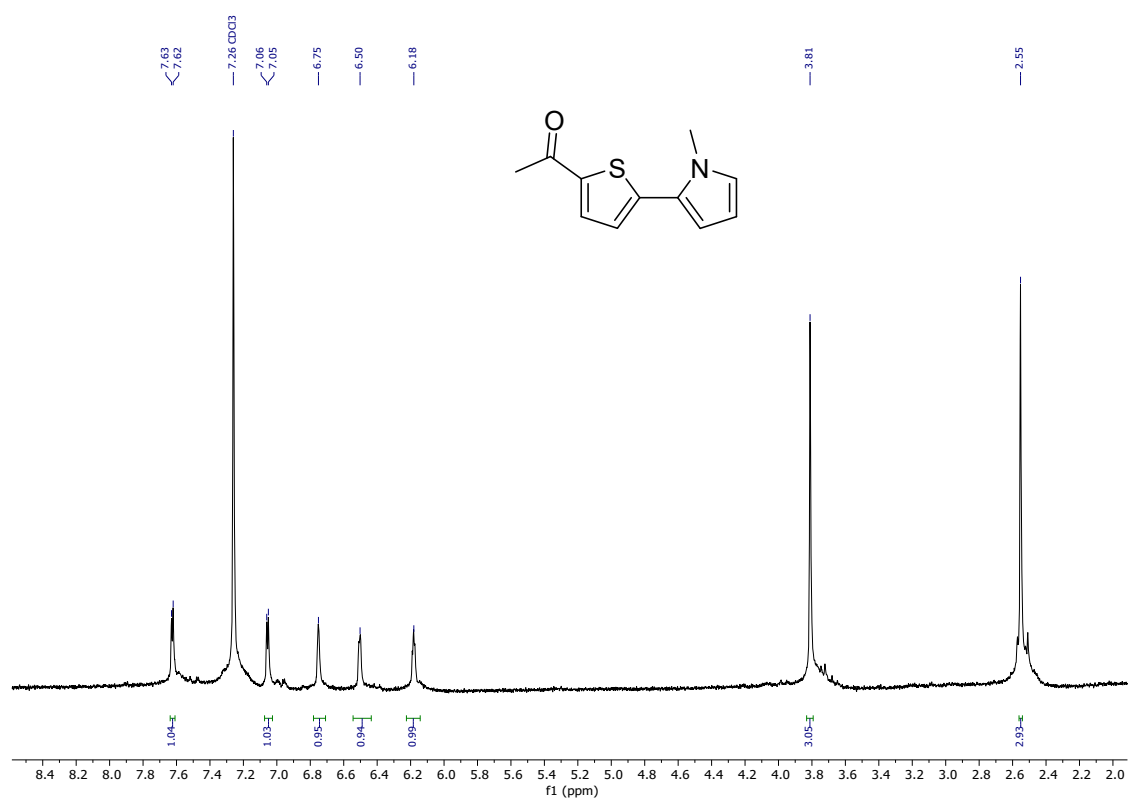

### <sup>1</sup>H NMR of 1-(5-(2,2-diphenylvinyl)thiophen-2-yl)ethanone

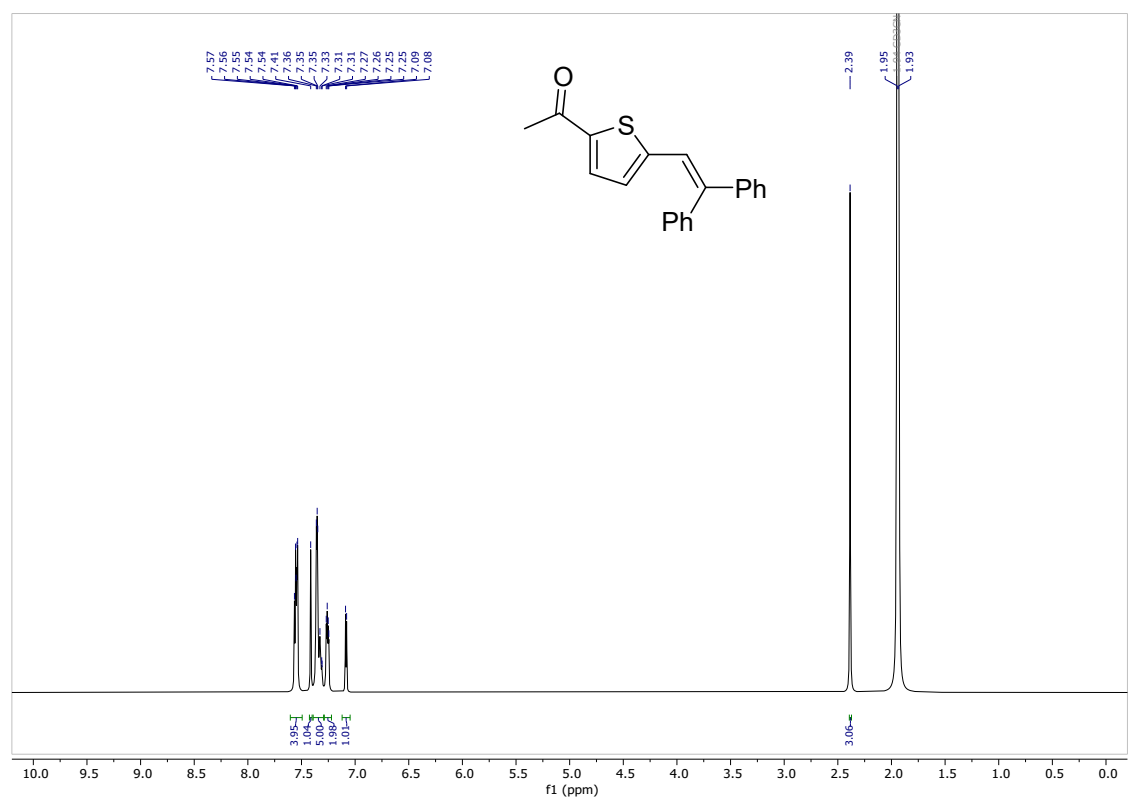

### <sup>13</sup>C NMR of 1-(5-(2,2-diphenylvinyl)thiophen-2-yl)ethanone

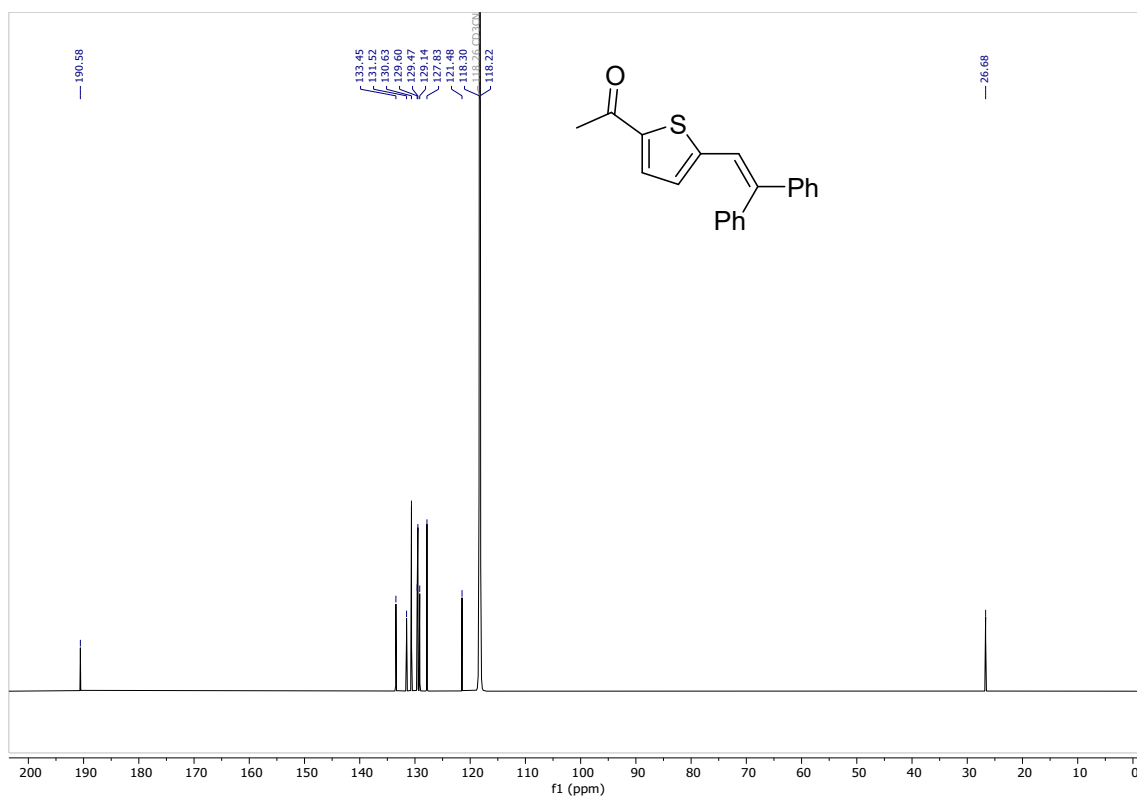

### <sup>1</sup>H NMR of diphenyl (5-acetylthiophen-2-yl)phosphonate

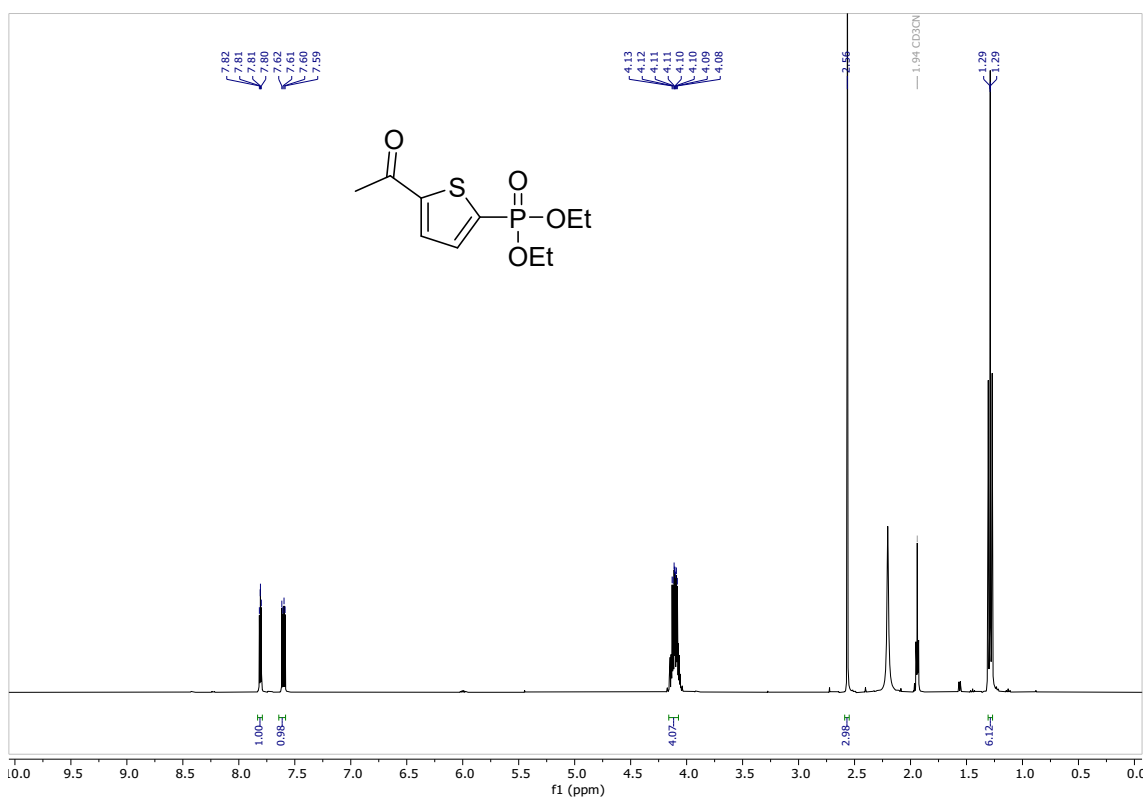

## 8. Mass spectrum of BDP-Br

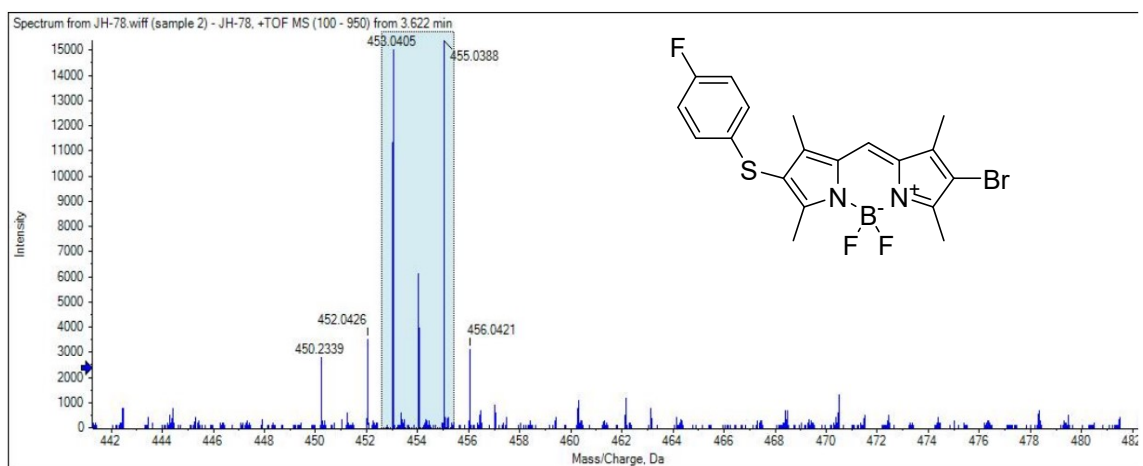

## 9. Geometrical parameters from Crystallographic data

### Geometric parameters for BDP (Å, °)

|        |             |          |             |
|--------|-------------|----------|-------------|
| C1—C2  | 1.401 (2)   | C10—H10B | 0.97        |
| C1—C9  | 1.405 (2)   | C10—H10C | 0.97        |
| C1—S1  | 1.7522 (16) | C11—H11A | 0.97        |
| C2—C3  | 1.403 (2)   | C11—H11B | 0.97        |
| C2—C10 | 1.492 (2)   | C11—H11C | 0.97        |
| C3—C4  | 1.391 (2)   | C12—H12A | 0.97        |
| C3—N2  | 1.3990 (17) | C12—H12B | 0.97        |
| C4—C5  | 1.377 (2)   | C12—H12C | 0.97        |
| C4—H4  | 0.94        | C13—H13A | 0.97        |
| C5—N1  | 1.3975 (18) | C13—H13B | 0.97        |
| C5—C6  | 1.423 (2)   | C13—H13C | 0.97        |
| C6—C7  | 1.378 (2)   | S1—C14   | 1.7775 (17) |
| C6—C11 | 1.494 (2)   | C14—C19  | 1.382 (2)   |
| C7—C8  | 1.408 (2)   | C14—C15  | 1.387 (2)   |
| C7—H7  | 0.94        | C15—C16  | 1.378 (3)   |
| C8—N1  | 1.3475 (19) | C15—H15  | 0.94        |
| C8—C12 | 1.489 (2)   | C16—C17  | 1.368 (3)   |
| N1—B1  | 1.547 (2)   | C16—H16  | 0.94        |
| B1—F1  | 1.3866 (19) | C17—F3   | 1.362 (2)   |
| B1—F2  | 1.3918 (19) | C17—C18  | 1.369 (3)   |



|           |             |               |           |
|-----------|-------------|---------------|-----------|
| B1—N2     | 1.551 (2)   | C18—C19       | 1.385 (3) |
| N2—C9     | 1.3481 (19) | C18—H18       | 0.94      |
| C9—C13    | 1.487 (2)   | C19—H19       | 0.94      |
| C10—H10A  | 0.97        |               |           |
| C2—C1—C9  | 108.11 (13) | H10A—C10—H10B | 109.5     |
| C2—C1—S1  | 126.02 (12) | C2—C10—H10C   | 109.5     |
| C9—C1—S1  | 125.40 (12) | H10A—C10—H10C | 109.5     |
| C1—C2—C3  | 105.88 (13) | H10B—C10—H10C | 109.5     |
| C1—C2—C10 | 127.30 (15) | C6—C11—H11A   | 109.5     |
| C3—C2—C10 | 126.82 (14) | C6—C11—H11B   | 109.5     |
| C4—C3—N2  | 120.12 (13) | H11A—C11—H11B | 109.5     |
| C4—C3—C2  | 130.85 (13) | C6—C11—H11C   | 109.5     |
| N2—C3—C2  | 109.00 (13) | H11A—C11—H11C | 109.5     |
| C5—C4—C3  | 122.06 (13) | H11B—C11—H11C | 109.5     |
| C5—C4—H4  | 119         | C8—C12—H12A   | 109.5     |
| C3—C4—H4  | 119         | C8—C12—H12B   | 109.5     |
| C4—C5—N1  | 120.64 (13) | H12A—C12—H12B | 109.5     |
| C4—C5—C6  | 130.88 (14) | C8—C12—H12C   | 109.5     |
| N1—C5—C6  | 108.48 (13) | H12A—C12—H12C | 109.5     |
| C7—C6—C5  | 106.03 (13) | H12B—C12—H12C | 109.5     |
| C7—C6—C11 | 128.36 (15) | C9—C13—H13A   | 109.5     |
| C5—C6—C11 | 125.61 (14) | C9—C13—H13B   | 109.5     |
| C6—C7—C8  | 108.49 (14) | H13A—C13—H13B | 109.5     |
| C6—C7—H7  | 125.8       | C9—C13—H13C   | 109.5     |

C8—C7—H7 125.8 H13A—C13—H13C 109.5  
 N1—C8—C7 109.20 (13) H13B—C13—H13C 109.5  
 N1—C8—C12 122.59 (14) C1—S1—C14 104.79 (7)  
 C7—C8—C12 128.20 (15) C19—C14—C15 119.33 (16)  
 C8—N1—C5 107.80 (12) C19—C14—S1 123.67 (13)  
 C8—N1—B1 127.22 (12) C15—C14—S1 116.96 (13)  
 C5—N1—B1 124.89 (12) C16—C15—C14 120.52 (18)  
 F1—B1—F2 109.33 (12) C16—C15—H15 119.7  
 F1—B1—N1 110.22 (13) C14—C15—H15 119.7  
 F2—B1—N1 110.03 (12) C17—C16—C15 118.68 (17)  
 F1—B1—N2 110.54 (12) C17—C16—H16 120.7  
 F2—B1—N2 109.67 (13) C15—C16—H16 120.7  
 N1—B1—N2 107.03 (11) F3—C17—C16 119.01 (19)  
 C9—N2—C3 107.96 (12) F3—C17—C18 118.5 (2)  
 C9—N2—B1 126.93 (12) C16—C17—C18 122.47 (18)  
 C3—N2—B1 124.99 (12) C17—C18—C19 118.46 (19)  
 N2—C9—C1 109.04 (13) C17—C18—H18 120.8  
 N2—C9—C13 123.05 (14) C19—C18—H18 120.8  
 C1—C9—C13 127.91 (15) C14—C19—C18 120.52 (17)  
 C2—C10—H10A 109.5 C14—C19—H19 119.7  
 C2—C10—H10B 109.5 C18—C19—H19 119.7  
 C9—C1—C2—C3 0.29 (16) C5—N1—B1—N2 -6.15 (18)  
 S1—C1—C2—C3 -172.17 (11) C4—C3—N2—C9 -177.76 (13)  
 C9—C1—C2—C10 -179.66 (15) C2—C3—N2—C9 0.50 (16)

S1—C1—C2—C10 7.9 (2) C4—C3—N2—B1 -1.5 (2)  
 C1—C2—C3—C4 177.53 (15) C2—C3—N2—B1 176.74 (13)  
 C10—C2—C3—C4 -2.5 (3) F1—B1—N2—C9 -59.85 (19)  
 C1—C2—C3—N2 -0.49 (16) F2—B1—N2—C9 60.76 (18)  
 C10—C2—C3—N2 179.47 (14) N1—B1—N2—C9 -179.90 (13)  
 N2—C3—C4—C5 -0.9 (2) F1—B1—N2—C3 124.62 (14)  
 C2—C3—C4—C5 -178.75 (14) F2—B1—N2—C3 -114.76 (15)  
 C3—C4—C5—N1 -0.6 (2) N1—B1—N2—C3 4.57 (18)  
 C3—C4—C5—C6 -179.69 (14) C3—N2—C9—C1 -0.32 (16)  
 C4—C5—C6—C7 178.27 (15) B1—N2—C9—C1 -176.46 (13)  
 N1—C5—C6—C7 -0.88 (16) C3—N2—C9—C13 179.49 (14)  
 C4—C5—C6—C11 -2.1 (2) B1—N2—C9—C13 3.3 (2)  
 N1—C5—C6—C11 178.71 (13) C2—C1—C9—N2 0.01 (17)  
 C5—C6—C7—C8 0.70 (17) S1—C1—C9—N2 172.53 (11)  
 C11—C6—C7—C8 -178.88 (15) C2—C1—C9—C13 -179.78 (15)  
 C6—C7—C8—N1 -0.27 (17) S1—C1—C9—C13 -7.3 (2)  
 C6—C7—C8—C12 179.08 (15) C2—C1—S1—C14 -96.10 (14)  
 C7—C8—N1—C5 -0.29 (16) C9—C1—S1—C14 92.70 (14)  
 C12—C8—N1—C5 -179.68 (14) C1—S1—C14—C19 -26.87 (17)  
 C7—C8—N1—B1 176.38 (13) C1—S1—C14—C15 155.26 (13)  
 C12—C8—N1—B1 -3.0 (2) C19—C14—C15—C16 1.0 (3)  
 C4—C5—N1—C8 -178.52 (13) S1—C14—C15—C16 178.92 (14)

|             |              |                 |              |
|-------------|--------------|-----------------|--------------|
| C6—C5—N1—C8 | 0.72 (15)    | C14—C15—C16—C17 | 0.0 (3)      |
| C4—C5—N1—B1 | 4.7 (2)      | C15—C16—C17—F3  | 178.96 (17)  |
| C6—C5—N1—B1 | -176.04 (12) | C15—C16—C17—C18 | -0.9 (3)     |
| C8—N1—B1—F1 | 57.46 (19)   | F3—C17—C18—C19  | -179.01 (18) |
| C5—N1—B1—F1 | -126.41 (14) | C16—C17—C18—C19 | 0.8 (3)      |
| C8—N1—B1—F2 | -63.18 (19)  | C15—C14—C19—C18 | -1.0 (3)     |
| C5—N1—B1—F2 | 112.95 (14)  | S1—C14—C19—C18  | -178.83 (15) |
| C8—N1—B1—N2 | 177.72 (13)  | C17—C18—C19—C14 | 0.1 (3)      |

**Geometric parameters for BDP-Br (Å, °)**

|             |           |              |           |
|-------------|-----------|--------------|-----------|
| Br1_1—C16_1 | 1.878 (2) | C19_2—H19A_2 | 0.98      |
| S1_1—C7_1   | 1.756 (2) | C19_2—H19B_2 | 0.98      |
| S1_1—C2_1   | 1.785 (3) | C19_2—H19C_2 | 0.98      |
| F1_1—C5_1   | 1.362 (3) | Br1_3—C16_3  | 1.876 (2) |
| F2_1—B1_1   | 1.382 (3) | S1_3—C7_3    | 1.759 (2) |
| F3_1—B1_1   | 1.394 (3) | S1_3—C1_3    | 1.783 (3) |
|             |           |              |           |
| N1_1—C8_1   | 1.346 (3) | F1_3—C4_3    | 1.360 (3) |
| N1_1—C9_1   | 1.400 (3) | F2_3—B1_3    | 1.388 (3) |
| N1_1—B1_1   | 1.553 (3) | F3_3—B1_3    | 1.393 (3) |
| N2_1—C15_1  | 1.349 (3) | N1_3—C10_3   | 1.351 (3) |
| N2_1—C12_1  | 1.405 (3) | N1_3—C9_3    | 1.400 (3) |
| N2_1—B1_1   | 1.558 (3) | N1_3—B1_3    | 1.552 (3) |
| C1_1—C6_1   | 1.390 (4) | N2_3—C17_3   | 1.346 (3) |
| C1_1—C2_1   | 1.390 (4) | N2_3—C13_3   | 1.403 (3) |
| C1_1—H1_1   | 0.95      | N2_3—B1_3    | 1.551 (3) |
| C2_1—C3_1   | 1.387 (3) | C1_3—C2_3    | 1.387 (4) |
| C3_1—C4_1   | 1.395 (4) | C1_3—C6_3    | 1.391 (4) |
| C3_1—H3_1   | 0.95      | C2_3—C3_3    | 1.386 (4) |
| C4_1—C5_1   | 1.367 (4) | C2_3—H2_3    | 0.95      |
| C4_1—H4_1   | 0.95      | C3_3—C4_3    | 1.367 (4) |
| C5_1—C6_1   | 1.373 (4) | C3_3—H3_3    | 0.95      |

C6\_1—H6\_1 0.95    C4\_3—C5\_3 1.370 (4)  
 C7\_1—C10\_1 1.393 (3)    C5\_3—C6\_3 1.389 (4)  
 C7\_1—C8\_1 1.423 (3)    C5\_3—H5\_3 0.95  
 C8\_1—C11\_1 1.485 (3)    C6\_3—H6\_3 0.95  
 C9\_1—C13\_1 1.386 (3)    C7\_3—C8\_3 1.395 (3)  
 C9\_1—C10\_1 1.417 (3)    C7\_3—C10\_3 1.411 (3)  
 C10\_1—C14\_1 1.490 (3)    C8\_3—C9\_3 1.419 (3)  
 C11\_1—H11A\_1 0.98    C8\_3—C11\_3 1.489 (3)  
 C11\_1—H11B\_1 0.98    C9\_3—C12\_3 1.389 (3)  
 C11\_1—H11C\_1 0.98    C10\_3—C14\_3 1.487 (3)  
 C12\_1—C13\_1 1.383 (3)    C11\_3—H11A\_3 0.98  
 C12\_1—C17\_1 1.417 (3)    C11\_3—H11B\_3 0.98  
 C13\_1—H13\_1 0.95    C11\_3—H11C\_3 0.98  
 C14\_1—H14A\_1 0.98    C12\_3—C13\_3 1.386 (3)  
 C14\_1—H14B\_1 0.98    C12\_3—H12\_3 0.95  
 C14\_1—H14C\_1 0.98    C13\_3—C15\_3 1.418 (3)  
 C15\_1—C16\_1 1.404 (3)    C14\_3—H14A\_3 0.98  
 C15\_1—C18\_1 1.485 (3)    C14\_3—H14B\_3 0.98  
 C16\_1—C17\_1 1.381 (3)    C14\_3—H14C\_3 0.98  
 C17\_1—C19\_1 1.494 (3)    C15\_3—C16\_3 1.380 (3)  
 C18\_1—H18A\_1 0.98    C15\_3—C18\_3 1.483 (3)  
 C18\_1—H18B\_1 0.98    C16\_3—C17\_3 1.404 (3)  
 C18\_1—H18C\_1 0.98    C17\_3—C19\_3 1.487 (3)  
 C18\_1—H18D\_1 0.98    C18\_3—H18A\_3 0.98

|              |           |              |           |
|--------------|-----------|--------------|-----------|
| C18_1—H18E_1 | 0.98      | C18_3—H18B_3 | 0.98      |
| C18_1—H18F_1 | 0.98      | C18_3—H18C_3 | 0.98      |
| C19_1—H19A_1 | 0.98      | C19_3—H19A_3 | 0.98      |
| C19_1—H19B_1 | 0.98      | C19_3—H19B_3 | 0.98      |
| C19_1—H19C_1 | 0.98      | C19_3—H19C_3 | 0.98      |
| Br1_2—C16_2  | 1.872 (2) | Br1_4—C16_4  | 1.876 (2) |
| S1_2—C7_2    | 1.755 (2) | S1_4—C7_4    | 1.755 (2) |
| S1_2—C1_2    | 1.782 (3) | S1_4—C1_4    | 1.782 (3) |
| F1_2—C4_2    | 1.363 (3) | F1_4—C4_4    | 1.366 (3) |
| F2_2—B1_2    | 1.384 (3) | F2_4—B1_4    | 1.391 (3) |
| F3_2—B1_2    | 1.399 (3) | F3_4—B1_4    | 1.391 (3) |
| N1_2—C10_2   | 1.344 (3) | N1_4—C10_4   | 1.351 (3) |
| N1_2—C9_2    | 1.401 (3) | N1_4—C9_4    | 1.400 (3) |
| N1_2—B1_2    | 1.551 (3) | N1_4—B1_4    | 1.545 (3) |
| N2_2—C17_2   | 1.347 (3) | N2_4—C17_4   | 1.347 (3) |
| N2_2—C13_2   | 1.404 (3) | N2_4—C13_4   | 1.403 (3) |
| N2_2—B1_2    | 1.551 (3) | N2_4—B1_4    | 1.550 (3) |
| C1_2—C6_2    | 1.379 (4) | C1_4—C6_4    | 1.384 (3) |
| C1_2—C2_2    | 1.398 (4) | C1_4—C2_4    | 1.393 (3) |
| C2_2—C3_2    | 1.385 (4) | C2_4—C3_4    | 1.382 (4) |
| C2_2—H2_2    | 0.95      | C2_4—H2_4    | 0.95      |
| C3_2—C4_2    | 1.369 (4) | C3_4—C4_4    | 1.378 (4) |

C3\_2—H3\_2 0.95    C3\_4—H3\_4 0.95  
 C4\_2—C5\_2 1.372 (4)    C4\_4—C5\_4 1.368 (3)  
 C5\_2—C6\_2 1.389 (4)    C5\_4—C6\_4 1.393 (3)  
 C5\_2—H5\_2 0.95    C5\_4—H5\_4 0.95  
 C6\_2—H6\_2 0.95    C6\_4—H6\_4 0.95  
 C7\_2—C8\_2 1.396 (3)    C7\_4—C8\_4 1.395 (3)  
 C7\_2—C10\_2 1.411 (3)    C7\_4—C10\_4 1.413 (3)  
 C8\_2—C9\_2 1.420 (3)    C8\_4—C9\_4 1.413 (3)  
 C8\_2—C11\_2 1.490 (3)    C8\_4—C11\_4 1.489 (3)  
 C9\_2—C12\_2 1.385 (3)    C9\_4—C12\_4 1.396 (3)  
 C10\_2—C14\_2    1.494 (3)    C10\_4—C14\_4    1.490 (3)  
 C11\_2—H11A\_2    0.98    C11\_4—H11A\_4    0.98  
 C11\_2—H11B\_2    0.98    C11\_4—H11B\_4    0.98  
 C11\_2—H11C\_2    0.98    C11\_4—H11C\_4    0.98  
 C11\_2—H11D\_2    0.98    C12\_4—C13\_4    1.377 (3)  
 C11\_2—H11E\_2    0.98    C12\_4—H12\_4    0.95  
 C11\_2—H11F\_2    0.98    C13\_4—C15\_4    1.426 (3)  
 C12\_2—C13\_2    1.380 (3)    C14\_4—H14A\_4    0.98  
 C12\_2—H12\_2    0.95    C14\_4—H14B\_4    0.98  
 C13\_2—C15\_2    1.418 (3)    C14\_4—H14C\_4    0.98  
 C14\_2—H14A\_2    0.98    C15\_4—C16\_4    1.377 (3)  
 C14\_2—H14B\_2    0.98    C15\_4—C18\_4    1.487 (3)  
 C14\_2—H14C\_2    0.98    C16\_4—C17\_4    1.410 (3)  
 C15\_2—C16\_2    1.378 (3)    C17\_4—C19\_4    1.481 (3)



C15\_2—C18\_2 1.493 (3) C18\_4—H18A\_4 0.98  
 C16\_2—C17\_2 1.405 (3) C18\_4—H18B\_4 0.98  
 C17\_2—C19\_2 1.486 (3) C18\_4—H18C\_4 0.98  
 C18\_2—H18A\_2 0.98 C19\_4—H19A\_4 0.98  
 C18\_2—H18B\_2 0.98 C19\_4—H19B\_4 0.98  
 C18\_2—H18C\_2 0.98 C19\_4—H19C\_4 0.98  
 C7\_1—S1\_1—C2\_1 102.14 (11) C15\_2—C18\_2—H18C\_2 109.5  
 C8\_1—N1\_1—C9\_1 108.49 (19) H18A\_2—C18\_2—H18C\_2 109.5  
 C8\_1—N1\_1—B1\_1 127.00 (19) H18B\_2—C18\_2—H18C\_2 109.5  
 C9\_1—N1\_1—B1\_1 124.43 (19) C17\_2—C19\_2—H19A\_2 109.5  
 C15\_1—N2\_1—C12\_1 108.17 (19) C17\_2—C19\_2—H19B\_2 109.5  
 C15\_1—N2\_1—B1\_1 126.67 (19) H19A\_2—C19\_2—H19B\_2 109.5  
 C12\_1—N2\_1—B1\_1 125.10 (19) C17\_2—C19\_2—H19C\_2 109.5  
 C6\_1—C1\_1—C2\_1 120.1 (2) H19A\_2—C19\_2—H19C\_2 109.5  
 C6\_1—C1\_1—H1\_1 120 H19B\_2—C19\_2—H19C\_2 109.5  
 C2\_1—C1\_1—H1\_1 120 F2\_2—B1\_2—F3\_2 109.09 (19)  
 C3\_1—C2\_1—C1\_1 119.9 (2) F2\_2—B1\_2—N2\_2 110.8 (2)  
 C3\_1—C2\_1—S1\_1 117.5 (2) F3\_2—B1\_2—N2\_2 109.73 (19)

C1\_1—C2\_1—S1\_1 122.63 (19) F2\_2—B1\_2—N1\_2 110.6 (2)  
 C2\_1—C3\_1—C4\_1 120.2 (3) F3\_2—B1\_2—N1\_2 109.8 (2)  
 C2\_1—C3\_1—H3\_1 119.9 N2\_2—B1\_2—N1\_2 106.87 (18)  
 C4\_1—C3\_1—H3\_1 119.9 C7\_3—S1\_3—C1\_3 103.11 (12)

C5\_1—C4\_1—C3\_1 118.3 (2)      C10\_3—N1\_3—C9\_3      107.9 (2)  
 C5\_1—C4\_1—H4\_1 120.9    C10\_3—N1\_3—B1\_3      126.8 (2)  
 C3\_1—C4\_1—H4\_1 120.9    C9\_3—N1\_3—B1\_3 125.36 (19)  
 F1\_1—C5\_1—C4\_1 118.7 (2)      C17\_3—N2\_3—C13\_3      108.11 (19)  
 F1\_1—C5\_1—C6\_1 118.3 (3)      C17\_3—N2\_3—B1\_3      126.6 (2)  
 C4\_1—C5\_1—C6\_1 123.0 (3)      C13\_3—N2\_3—B1\_3      125.28 (19)  
 C5\_1—C6\_1—C1\_1 118.5 (3)      C2\_3—C1\_3—C6\_3 119.6 (2)  
 C5\_1—C6\_1—H6\_1 120.8    C2\_3—C1\_3—S1\_3 117.0 (2)  
 C1\_1—C6\_1—H6\_1 120.8    C6\_3—C1\_3—S1\_3 123.4 (2)  
 C10\_1—C7\_1—C8\_1      108.2 (2)      C3\_3—C2\_3—C1\_3 120.6 (3)  
 C10\_1—C7\_1—S1\_1      127.04 (18)    C3\_3—C2\_3—H2\_3 119.7  
 C8\_1—C7\_1—S1\_1 124.71 (18)    C1\_3—C2\_3—H2\_3 119.7  
 N1\_1—C8\_1—C7\_1 108.6 (2)      C4\_3—C3\_3—C2\_3 118.4 (3)  
 N1\_1—C8\_1—C11\_1      123.0 (2)      C4\_3—C3\_3—H3\_3 120.8  
 C7\_1—C8\_1—C11\_1      128.3 (2)      C2\_3—C3\_3—H3\_3 120.8  
 C13\_1—C9\_1—N1\_1      120.8 (2)      F1\_3—C4\_3—C3\_3 118.6 (3)  
 C13\_1—C9\_1—C10\_1      130.6 (2)      F1\_3—C4\_3—C5\_3 118.5 (3)  
 N1\_1—C9\_1—C10\_1      108.62 (19)    C3\_3—C4\_3—C5\_3 122.9 (3)  
 C7\_1—C10\_1—C9\_1      106.0 (2)      C4\_3—C5\_3—C6\_3 118.6 (3)  
 C7\_1—C10\_1—C14\_1      127.3 (2)      C4\_3—C5\_3—H5\_3 120.7  
 C9\_1—C10\_1—C14\_1      126.6 (2)      C6\_3—C5\_3—H5\_3 120.7  
 C8\_1—C11\_1—H11A\_1      109.5    C5\_3—C6\_3—C1\_3 120.0 (3)  
 C8\_1—C11\_1—H11B\_1      109.5    C5\_3—C6\_3—H6\_3 120  
 H11A\_1—C11\_1—H11B\_1 109.5    C1\_3—C6\_3—H6\_3 120

|                     |             |                     |             |
|---------------------|-------------|---------------------|-------------|
| C8_1—C11_1—H11C_1   | 109.5       | C8_3—C7_3—C10_3     | 108.3 (2)   |
| H11A_1—C11_1—H11C_1 | 109.5       | C8_3—C7_3—S1_3      | 126.1 (2)   |
| H11B_1—C11_1—H11C_1 | 109.5       | C10_3—C7_3—S1_3     | 125.26 (19) |
| C13_1—C12_1—N2_1    | 119.9 (2)   | C7_3—C8_3—C9_3      | 105.8 (2)   |
| C13_1—C12_1—C17_1   | 131.3 (2)   | C7_3—C8_3—C11_3     | 127.9 (2)   |
| N2_1—C12_1—C17_1    | 108.74 (19) | C9_3—C8_3—C11_3     | 126.4 (2)   |
| C12_1—C13_1—C9_1    | 122.3 (2)   | C12_3—C9_3—N1_3     | 120.1 (2)   |
| C12_1—C13_1—H13_1   | 118.8       | C12_3—C9_3—C8_3     | 131.1 (2)   |
| C9_1—C13_1—H13_1    | 118.8       | N1_3—C9_3—C8_3      | 108.9 (2)   |
| C10_1—C14_1—H14A_1  | 109.5       | N1_3—C10_3—C7_3     | 109.2 (2)   |
| C10_1—C14_1—H14B_1  | 109.5       | N1_3—C10_3—C14_3    | 123.1 (2)   |
| H14A_1—C14_1—H14B_1 | 109.5       | C7_3—C10_3—C14_3    | 127.7 (2)   |
| C10_1—C14_1—H14C_1  | 109.5       | C8_3—C11_3—H11A_3   | 109.5       |
| H14A_1—C14_1—H14C_1 | 109.5       | C8_3—C11_3—H11B_3   | 109.5       |
| H14B_1—C14_1—H14C_1 | 109.5       | H11A_3—C11_3—H11B_3 | 109.5       |
| N2_1—C15_1—C16_1    | 108.0 (2)   | C8_3—C11_3—H11C_3   | 109.5       |
| N2_1—C15_1—C18_1    | 123.5 (2)   | H11A_3—C11_3—H11C_3 | 109.5       |
| C16_1—C15_1—C18_1   | 128.5 (2)   | H11B_3—C11_3—H11C_3 | 109.5       |
| C17_1—C16_1—C15_1   | 110.0 (2)   | C13_3—C12_3—C9_3    | 122.3 (2)   |
| C17_1—C16_1—Br1_1   | 126.35 (18) | C13_3—C12_3—H12_3   | 118.8       |
| C15_1—C16_1—Br1_1   | 123.64 (17) | C9_3—C12_3—H12_3    | 118.8       |
| C16_1—C17_1—C12_1   | 105.1 (2)   | C12_3—C13_3—N2_3    | 120.1 (2)   |
| C16_1—C17_1—C19_1   | 127.8 (2)   | C12_3—C13_3—C15_3   | 131.0 (2)   |
| C12_1—C17_1—C19_1   | 127.1 (2)   | N2_3—C13_3—C15_3    | 108.9 (2)   |

|                     |       |                     |             |
|---------------------|-------|---------------------|-------------|
| C15_1—C18_1—H18A_1  | 109.5 | C10_3—C14_3—H14A_3  | 109.5       |
| C15_1—C18_1—H18B_1  | 109.5 | C10_3—C14_3—H14B_3  | 109.5       |
| H18A_1—C18_1—H18B_1 | 109.5 | H14A_3—C14_3—H14B_3 | 109.5       |
| C15_1—C18_1—H18C_1  | 109.5 | C10_3—C14_3—H14C_3  | 109.5       |
| H18A_1—C18_1—H18C_1 | 109.5 | H14A_3—C14_3—H14C_3 | 109.5       |
| H18B_1—C18_1—H18C_1 | 109.5 | H14B_3—C14_3—H14C_3 | 109.5       |
| C15_1—C18_1—H18D_1  | 109.5 | C16_3—C15_3—C13_3   | 104.9 (2)   |
| H18A_1—C18_1—H18D_1 | 141.1 | C16_3—C15_3—C18_3   | 127.9 (2)   |
| H18B_1—C18_1—H18D_1 | 56.3  | C13_3—C15_3—C18_3   | 127.2 (2)   |
| H18C_1—C18_1—H18D_1 | 56.3  | C15_3—C16_3—C17_3   | 110.0 (2)   |
| C15_1—C18_1—H18E_1  | 109.5 | C15_3—C16_3—Br1_3   | 125.44 (18) |
| H18A_1—C18_1—H18E_1 | 56.3  | C17_3—C16_3—Br1_3   | 124.53 (18) |
| H18B_1—C18_1—H18E_1 | 141.1 | N2_3—C17_3—C16_3    | 108.1 (2)   |
| H18C_1—C18_1—H18E_1 | 56.3  | N2_3—C17_3—C19_3    | 123.2 (2)   |
| H18D_1—C18_1—H18E_1 | 109.5 | C16_3—C17_3—C19_3   | 128.7 (2)   |
| C15_1—C18_1—H18F_1  | 109.5 | C15_3—C18_3—H18A_3  | 109.5       |
| H18A_1—C18_1—H18F_1 | 56.3  | C15_3—C18_3—H18B_3  | 109.5       |
| H18B_1—C18_1—H18F_1 | 56.3  | H18A_3—C18_3—H18B_3 | 109.5       |
| H18C_1—C18_1—H18F_1 | 141.1 | C15_3—C18_3—H18C_3  | 109.5       |
| H18D_1—C18_1—H18F_1 | 109.5 | H18A_3—C18_3—H18C_3 | 109.5       |
| H18E_1—C18_1—H18F_1 | 109.5 | H18B_3—C18_3—H18C_3 | 109.5       |
| C17_1—C19_1—H19A_1  | 109.5 | C17_3—C19_3—H19A_3  | 109.5       |

C17\_1—C19\_1—H19B\_1 109.5 C17\_3—C19\_3—H19B\_3 109.5  
H19A\_1—C19\_1—H19B\_1 109.5 H19A\_3—C19\_3—H19B\_3 109.5  
C17\_1—C19\_1—H19C\_1 109.5 C17\_3—C19\_3—H19C\_3 109.5  
H19A\_1—C19\_1—H19C\_1 109.5 H19A\_3—C19\_3—H19C\_3 109.5  
H19B\_1—C19\_1—H19C\_1 109.5 H19B\_3—C19\_3—H19C\_3 109.5  
F2\_1—B1\_1—F3\_1 109.47 (19) F2\_3—B1\_3—F3\_3 109.4 (2)  
F2\_1—B1\_1—N1\_1 110.66 (19) F2\_3—B1\_3—N2\_3 110.2 (2)  
F3\_1—B1\_1—N1\_1 110.1 (2) F3\_3—B1\_3—N2\_3 109.71 (19)  
F2\_1—B1\_1—N2\_1 110.3 (2) F2\_3—B1\_3—N1\_3 110.21 (19)  
F3\_1—B1\_1—N2\_1 109.35 (19) F3\_3—B1\_3—N1\_3 110.5 (2)  
N1\_1—B1\_1—N2\_1 106.93 (18) N2\_3—B1\_3—N1\_3 106.83 (19)  
C7\_2—S1\_2—C1\_2 102.81 (12) C7\_4—S1\_4—C1\_4 103.61 (11)  
C10\_2—N1\_2—C9\_2 107.76 (19) C10\_4—N1\_4—C9\_4 108.39 (19)  
C10\_2—N1\_2—B1\_2 127.3 (2) C10\_4—N1\_4—B1\_4 126.52 (19)  
C9\_2—N1\_2—B1\_2 124.89 (19) C9\_4—N1\_4—B1\_4 125.09 (18)  
C17\_2—N2\_2—C13\_2 108.35 (19) C17\_4—N2\_4—C13\_4 108.38 (19)  
C17\_2—N2\_2—B1\_2 126.7 (2) C17\_4—N2\_4—B1\_4 125.93 (19)  
C13\_2—N2\_2—B1\_2 124.86 (19) C13\_4—N2\_4—B1\_4 125.66 (19)  
C6\_2—C1\_2—C2\_2 120.0 (2) C6\_4—C1\_4—C2\_4 119.7 (2)  
C6\_2—C1\_2—S1\_2 122.8 (2) C6\_4—C1\_4—S1\_4 124.24 (18)  
C2\_2—C1\_2—S1\_2 117.2 (2) C2\_4—C1\_4—S1\_4 116.07 (19)  
C3\_2—C2\_2—C1\_2 119.8 (3) C3\_4—C2\_4—C1\_4 120.4 (2)  
C3\_2—C2\_2—H2\_2 120.1 C3\_4—C2\_4—H2\_4 119.8  
C1\_2—C2\_2—H2\_2 120.1 C1\_4—C2\_4—H2\_4 119.8

C4\_2—C3\_2—C2\_2 118.6 (3)      C4\_4—C3\_4—C2\_4 118.5 (2)  
 C4\_2—C3\_2—H3\_2 120.7    C4\_4—C3\_4—H3\_4 120.7  
 C2\_2—C3\_2—H3\_2 120.7    C2\_4—C3\_4—H3\_4 120.7  
 F1\_2—C4\_2—C3\_2 118.3 (3)      F1\_4—C4\_4—C5\_4 118.7 (2)  
 F1\_2—C4\_2—C5\_2 118.7 (3)      F1\_4—C4\_4—C3\_4 118.7 (2)  
 C3\_2—C4\_2—C5\_2 123.0 (3)      C5\_4—C4\_4—C3\_4 122.6 (2)

  

C4\_2—C5\_2—C6\_2 118.2 (3)      C4\_4—C5\_4—C6\_4 118.5 (2)  
 C4\_2—C5\_2—H5\_2 120.9    C4\_4—C5\_4—H5\_4 120.7  
 C6\_2—C5\_2—H5\_2 120.9    C6\_4—C5\_4—H5\_4 120.7  
 C1\_2—C6\_2—C5\_2 120.3 (3)      C1\_4—C6\_4—C5\_4 120.3 (2)  
 C1\_2—C6\_2—H6\_2 119.8    C1\_4—C6\_4—H6\_4 119.9  
 C5\_2—C6\_2—H6\_2 119.8    C5\_4—C6\_4—H6\_4 119.9  
 C8\_2—C7\_2—C10\_2      107.9 (2)      C8\_4—C7\_4—C10\_4      108.4 (2)  
 C8\_2—C7\_2—S1\_2 125.67 (19)    C8\_4—C7\_4—S1\_4 127.52 (19)  
 C10\_2—C7\_2—S1\_2      126.14 (19)    C10\_4—C7\_4—S1\_4      124.03 (19)  
 C7\_2—C8\_2—C9\_2 105.8 (2)      C7\_4—C8\_4—C9\_4 106.0 (2)  
 C7\_2—C8\_2—C11\_2      128.0 (2)      C7\_4—C8\_4—C11\_4      127.4 (2)  
 C9\_2—C8\_2—C11\_2      126.2 (2)      C9\_4—C8\_4—C11\_4      126.6 (2)  
 C12\_2—C9\_2—N1\_2      120.5 (2)      C12\_4—C9\_4—N1\_4      120.3 (2)  
 C12\_2—C9\_2—C8\_2      130.7 (2)      C12\_4—C9\_4—C8\_4      131.1 (2)  
 N1\_2—C9\_2—C8\_2 108.82 (19)    N1\_4—C9\_4—C8\_4 108.6 (2)  
 N1\_2—C10\_2—C7\_2      109.7 (2)      N1\_4—C10\_4—C7\_4      108.6 (2)

|                     |           |                     |             |
|---------------------|-----------|---------------------|-------------|
| N1_2—C10_2—C14_2    | 122.4 (2) | N1_4—C10_4—C14_4    | 122.6 (2)   |
| C7_2—C10_2—C14_2    | 128.0 (2) | C7_4—C10_4—C14_4    | 128.8 (2)   |
| C8_2—C11_2—H11A_2   | 109.5     | C8_4—C11_4—H11A_4   | 109.5       |
| C8_2—C11_2—H11B_2   | 109.5     | C8_4—C11_4—H11B_4   | 109.5       |
| H11A_2—C11_2—H11B_2 | 109.5     | H11A_4—C11_4—H11B_4 | 109.5       |
| C8_2—C11_2—H11C_2   | 109.5     | C8_4—C11_4—H11C_4   | 109.5       |
| H11A_2—C11_2—H11C_2 | 109.5     | H11A_4—C11_4—H11C_4 | 109.5       |
| H11B_2—C11_2—H11C_2 | 109.5     | H11B_4—C11_4—H11C_4 | 109.5       |
| C8_2—C11_2—H11D_2   | 109.5     | C13_4—C12_4—C9_4    | 122.1 (2)   |
| H11A_2—C11_2—H11D_2 | 141.1     | C13_4—C12_4—H12_4   | 119         |
| H11B_2—C11_2—H11D_2 | 56.3      | C9_4—C12_4—H12_4    | 119         |
| H11C_2—C11_2—H11D_2 | 56.3      | C12_4—C13_4—N2_4    | 120.0 (2)   |
| C8_2—C11_2—H11E_2   | 109.5     | C12_4—C13_4—C15_4   | 131.3 (2)   |
| H11A_2—C11_2—H11E_2 | 56.3      | N2_4—C13_4—C15_4    | 108.76 (19) |
| H11B_2—C11_2—H11E_2 | 141.1     | C10_4—C14_4—H14A_4  | 109.5       |
| H11C_2—C11_2—H11E_2 | 56.3      | C10_4—C14_4—H14B_4  | 109.5       |
| H11D_2—C11_2—H11E_2 | 109.5     | H14A_4—C14_4—H14B_4 | 109.5       |
| C8_2—C11_2—H11F_2   | 109.5     | C10_4—C14_4—H14C_4  | 109.5       |
| H11A_2—C11_2—H11F_2 | 56.3      | H14A_4—C14_4—H14C_4 | 109.5       |
| H11B_2—C11_2—H11F_2 | 56.3      | H14B_4—C14_4—H14C_4 | 109.5       |
| H11C_2—C11_2—H11F_2 | 141.1     | C16_4—C15_4—C13_4   | 104.8 (2)   |
| H11D_2—C11_2—H11F_2 | 109.5     | C16_4—C15_4—C18_4   | 128.2 (2)   |
| H11E_2—C11_2—H11F_2 | 109.5     | C13_4—C15_4—C18_4   | 127.0 (2)   |
| C13_2—C12_2—C9_2    | 122.1 (2) | C15_4—C16_4—C17_4   | 110.3 (2)   |

|                     |             |                     |             |
|---------------------|-------------|---------------------|-------------|
| C13_2—C12_2—H12_2   | 119         | C15_4—C16_4—Br1_4   | 126.61 (18) |
| C9_2—C12_2—H12_2    | 119         | C17_4—C16_4—Br1_4   | 123.04 (17) |
| C12_2—C13_2—N2_2    | 120.5 (2)   | N2_4—C17_4—C16_4    | 107.8 (2)   |
| C12_2—C13_2—C15_2   | 131.0 (2)   | N2_4—C17_4—C19_4    | 123.4 (2)   |
| N2_2—C13_2—C15_2    | 108.5 (2)   | C16_4—C17_4—C19_4   | 128.8 (2)   |
| C10_2—C14_2—H14A_2  | 109.5       | C15_4—C18_4—H18A_4  | 109.5       |
| C10_2—C14_2—H14B_2  | 109.5       | C15_4—C18_4—H18B_4  | 109.5       |
| H14A_2—C14_2—H14B_2 | 109.5       | H18A_4—C18_4—H18B_4 | 109.5       |
| C10_2—C14_2—H14C_2  | 109.5       | C15_4—C18_4—H18C_4  | 109.5       |
| H14A_2—C14_2—H14C_2 | 109.5       | H18A_4—C18_4—H18C_4 | 109.5       |
| H14B_2—C14_2—H14C_2 | 109.5       | H18B_4—C18_4—H18C_4 | 109.5       |
| C16_2—C15_2—C13_2   | 105.2 (2)   | C17_4—C19_4—H19A_4  | 109.5       |
|                     |             |                     |             |
| C16_2—C15_2—C18_2   | 127.6 (2)   | C17_4—C19_4—H19B_4  | 109.5       |
| C13_2—C15_2—C18_2   | 127.2 (2)   | H19A_4—C19_4—H19B_4 | 109.5       |
| C15_2—C16_2—C17_2   | 110.0 (2)   | C17_4—C19_4—H19C_4  | 109.5       |
| C15_2—C16_2—Br1_2   | 125.88 (19) | H19A_4—C19_4—H19C_4 | 109.5       |
| C17_2—C16_2—Br1_2   | 124.07 (18) | H19B_4—C19_4—H19C_4 | 109.5       |
| N2_2—C17_2—C16_2    | 107.9 (2)   | F2_4—B1_4—F3_4      | 109.71 (19) |
| N2_2—C17_2—C19_2    | 123.8 (2)   | F2_4—B1_4—N1_4      | 110.40 (19) |
| C16_2—C17_2—C19_2   | 128.3 (2)   | F3_4—B1_4—N1_4      | 110.39 (19) |
| C15_2—C18_2—H18A_2  | 109.5       | F2_4—B1_4—N2_4      | 109.73 (19) |
| C15_2—C18_2—H18B_2  | 109.5       | F3_4—B1_4—N2_4      | 109.77 (18) |



H18A\_2—C18\_2—H18B\_2 109.5 N1\_4—B1\_4—N2\_4 106.79 (18)  
 C6\_1—C1\_1—C2\_1—C3\_1 -1.6 (4) C7\_3—S1\_3—C1\_3—C2\_3 149.6 (2)  
 C6\_1—C1\_1—C2\_1—S1\_1 179.7 (2) C7\_3—S1\_3—C1\_3—C6\_3 -33.2 (3)  
 C7\_1—S1\_1—C2\_1—C3\_1 137.3 (2) C6\_3—C1\_3—C2\_3—C3\_3 0.3 (4)  
 C7\_1—S1\_1—C2\_1—C1\_1 -44.0 (2) S1\_3—C1\_3—C2\_3—C3\_3 177.6 (2)  
 C1\_1—C2\_1—C3\_1—C4\_1 10.4 (4) C1\_3—C2\_3—C3\_3—C4\_3 0.8 (4)  
 S1\_1—C2\_1—C3\_1—C4\_1 179.14 (19) C2\_3—C3\_3—C4\_3—F1\_3 179.2 (2)  
 C2\_1—C3\_1—C4\_1—C5\_1 11.0 (4) C2\_3—C3\_3—C4\_3—C5\_3 -0.9 (4)  
 C3\_1—C4\_1—C5\_1—F1\_1 178.6 (2) F1\_3—C4\_3—C5\_3—C6\_3 179.9 (2)  
 C3\_1—C4\_1—C5\_1—C6\_1 -1.3 (4) C3\_3—C4\_3—C5\_3—C6\_3 0.0 (4)  
 F1\_1—C5\_1—C6\_1—C1\_1 -179.8 (2) C4\_3—C5\_3—C6\_3—C1\_3 1.1 (4)  
 C4\_1—C5\_1—C6\_1—C1\_1 10.2 (4) C2\_3—C1\_3—C6\_3—C5\_3 -1.2 (4)  
 C2\_1—C1\_1—C6\_1—C5\_1 11.3 (4) S1\_3—C1\_3—C6\_3—C5\_3 -178.3 (2)  
 C2\_1—S1\_1—C7\_1—C10\_1 -56.1 (2) C1\_3—S1\_3—C7\_3—C8\_3 121.9  
 (2)  
 C2\_1—S1\_1—C7\_1—C8\_1 126.6 (2) C1\_3—S1\_3—C7\_3—C10\_3 -64.9  
 (2)  
 C9\_1—N1\_1—C8\_1—C7\_1 10.5 (3) C10\_3—C7\_3—C8\_3—C9\_3 0.2 (3)  
 B1\_1—N1\_1—C8\_1—C7\_1 -176.3 (2) S1\_3—C7\_3—C8\_3—C9\_3 174.30 (18)  
 C9\_1—N1\_1—C8\_1—C11\_1 179.9 (2) C10\_3—C7\_3—C8\_3—C11\_3  
 -179.3 (2)  
 B1\_1—N1\_1—C8\_1—C11\_1 3.1 (4) S1\_3—C7\_3—C8\_3—C11\_3 -5.2  
 (4)  
 C10\_1—C7\_1—C8\_1—N1\_1 0.4 (3) C10\_3—N1\_3—C9\_3—C12\_3 -179.2  
 (2)

S1\_1—C7\_1—C8\_1—N1\_1 178.07 (17) B1\_3—N1\_3—C9\_3—C12\_3 1.1 (3)  
 C10\_1—C7\_1—C8\_1—C11\_1 -178.9 (2) C10\_3—N1\_3—C9\_3—C8\_3  
 0.0 (3)  
 S1\_1—C7\_1—C8\_1—C11\_1 -1.3 (4) B1\_3—N1\_3—C9\_3—C8\_3-179.8  
 (2)  
 C8\_1—N1\_1—C9\_1—C13\_1 177.3 (2) C7\_3—C8\_3—C9\_3—C12\_3  
 178.9 (2)  
 B1\_1—N1\_1—C9\_1—C13\_1 -5.8 (3) C11\_3—C8\_3—C9\_3—C12\_3  
 -1.5 (4)  
 C8\_1—N1\_1—C9\_1—C10\_1 -1.2 (3) C7\_3—C8\_3—C9\_3—N1\_3-0.1  
 (3)  
 B1\_1—N1\_1—C9\_1—C10\_1 175.7 (2) C11\_3—C8\_3—C9\_3—N1\_3  
 179.4 (2)  
 C8\_1—C7\_1—C10\_1—C9\_1 -1.1 (3) C9\_3—N1\_3—C10\_3—C7\_3  
 0.1 (3)  
 S1\_1—C7\_1—C10\_1—C9\_1 -178.73 (18) B1\_3—N1\_3—C10\_3—C7\_3  
 179.9 (2)  
 C8\_1—C7\_1—C10\_1—C14\_1 179.0 (2) C9\_3—N1\_3—C10\_3—C14\_3  
 179.4 (2)  
 S1\_1—C7\_1—C10\_1—C14\_1 1.4 (4) B1\_3—N1\_3—C10\_3—C14\_3 -0.8  
 (4)  
 C13\_1—C9\_1—C10\_1—C7\_1 -176.9 (2) C8\_3—C7\_3—C10\_3—N1\_3  
 -0.2 (3)  
 N1\_1—C9\_1—C10\_1—C7\_1 1.4 (3) S1\_3—C7\_3—C10\_3—N1\_3  
 -174.37 (17)  
 C13\_1—C9\_1—C10\_1—C14\_1 3.0 (4) C8\_3—C7\_3—C10\_3—C14\_3 -179.4  
 (2)

|                                     |            |                         |         |
|-------------------------------------|------------|-------------------------|---------|
| N1_1—C9_1—C10_1—C14_1<br>6.4 (4)    | -178.7 (2) | S1_3—C7_3—C10_3—C14_3   |         |
| C15_1—N2_1—C12_1—C13_1<br>0.6 (3)   | 179.8 (2)  | N1_3—C9_3—C12_3—C13_3   |         |
| B1_1—N2_1—C12_1—C13_1<br>(2)        | 2.5 (3)    | C8_3—C9_3—C12_3—C13_3   | -178.3  |
| C15_1—N2_1—C12_1—C17_1<br>(3)       | 0.4 (2)    | C9_3—C12_3—C13_3—N2_3   | -0.8    |
| B1_1—N2_1—C12_1—C17_1<br>-179.5 (2) | -176.9 (2) | C9_3—C12_3—C13_3—C15_3  |         |
| N2_1—C12_1—C13_1—C9_1<br>(2)        | 1.1 (3)    | C17_3—N2_3—C13_3—C12_3  | -178.9  |
| C17_1—C12_1—C13_1—C9_1<br>-0.7 (3)  | -179.6 (2) | B1_3—N2_3—C13_3—C12_3   |         |
| N1_1—C9_1—C13_1—C12_1               | 0.5 (3)    | C17_3—N2_3—C13_3—C15_3  | 0.0 (3) |
| C10_1—C9_1—C13_1—C12_1<br>178.3 (2) | 178.7 (2)  | B1_3—N2_3—C13_3—C15_3   |         |
| C12_1—N2_1—C15_1—C16_1<br>(2)       | 0.2 (2)    | C12_3—C13_3—C15_3—C16_3 | 178.8   |
| B1_1—N2_1—C15_1—C16_1<br>0.0 (3)    | 177.5 (2)  | N2_3—C13_3—C15_3—C16_3  |         |
| C12_1—N2_1—C15_1—C18_1<br>-1.0 (4)  | -179.3 (2) | C12_3—C13_3—C15_3—C18_3 |         |
| B1_1—N2_1—C15_1—C18_1<br>-179.8 (2) | -2.0 (4)   | N2_3—C13_3—C15_3—C18_3  |         |

|                         |              |                         |         |
|-------------------------|--------------|-------------------------|---------|
| N2_1—C15_1—C16_1—C17_1  | -0.8 (3)     | C13_3—C15_3—C16_3—C17_3 |         |
|                         | 0.0 (3)      |                         |         |
| C18_1—C15_1—C16_1—C17_1 | 178.7 (2)    | C18_3—C15_3—C16_3—C17_3 |         |
|                         | 179.8 (2)    |                         |         |
| N2_1—C15_1—C16_1—Br1_1  | -179.74 (16) | C13_3—C15_3—C16_3—Br1_3 |         |
|                         | -178.06 (17) |                         |         |
| C18_1—C15_1—C16_1—Br1_1 | -0.3 (4)     | C18_3—C15_3—C16_3—Br1_3 |         |
|                         | 1.7 (4)      |                         |         |
| C15_1—C16_1—C17_1—C12_1 | 1.0 (3)      | C13_3—N2_3—C17_3—C16_3  | 0.0 (3) |
| Br1_1—C16_1—C17_1—C12_1 | 179.92 (17)  | B1_3—N2_3—C17_3—C16_3   |         |
|                         | -178.2 (2)   |                         |         |
| C15_1—C16_1—C17_1—C19_1 | -179.6 (2)   | C13_3—N2_3—C17_3—C19_3  |         |
|                         | -179.7 (2)   |                         |         |
| Br1_1—C16_1—C17_1—C19_1 | -0.7 (4)     | B1_3—N2_3—C17_3—C19_3   |         |
|                         | 2.1 (4)      |                         |         |
| C13_1—C12_1—C17_1—C16_1 | 179.8 (2)    | C15_3—C16_3—C17_3—N2_3  |         |
|                         | 0.0 (3)      |                         |         |
| N2_1—C12_1—C17_1—C16_1  | -0.9 (2)     | Br1_3—C16_3—C17_3—N2_3  |         |
|                         | 178.11 (16)  |                         |         |
| C13_1—C12_1—C17_1—C19_1 | 0.4 (4)      | C15_3—C16_3—C17_3—C19_3 | 179.6   |
|                         | (2)          |                         |         |
| N2_1—C12_1—C17_1—C19_1  | 179.8 (2)    | Br1_3—C16_3—C17_3—C19_3 |         |
|                         | -2.3 (4)     |                         |         |
| C8_1—N1_1—B1_1—F2_1     | -55.6 (3)    | C17_3—N2_3—B1_3—F2_3    | -60.4   |
|                         | (3)          |                         |         |
| C9_1—N1_1—B1_1—F2_1     | 128.1 (2)    | C13_3—N2_3—B1_3—F2_3    | 121.7   |
|                         | (2)          |                         |         |

|                                |                                 |                            |
|--------------------------------|---------------------------------|----------------------------|
| C8_1—N1_1—B1_1—F3_1 65.6 (3)   | C17_3—N2_3—B1_3—F3_3            | 60.1                       |
| (3)                            |                                 |                            |
| C9_1—N1_1—B1_1—F3_1 -110.7 (2) | C13_3—N2_3—B1_3—F3_3            | -117.9                     |
| (2)                            |                                 |                            |
| C8_1—N1_1—B1_1—N2_1 -175.7 (2) | C17_3—N2_3—B1_3—N1_3            | 179.9                      |
| (2)                            |                                 |                            |
| C9_1—N1_1—B1_1—N2_1 18.0 (3)   | C13_3—N2_3—B1_3—N1_3            | 2.0 (3)                    |
| C15_1—N2_1—B1_1—F2_1           | 56.4 (3)                        | C10_3—N1_3—B1_3—F2_3       |
| 58.4 (3)                       |                                 |                            |
| C12_1—N2_1—B1_1—F2_1           | -126.8 (2)                      | C9_3—N1_3—B1_3—F2_3 -121.9 |
| (2)                            |                                 |                            |
| C15_1—N2_1—B1_1—F3_1           | -64.0 (3)                       | C10_3—N1_3—B1_3—F3_3       |
| -62.6 (3)                      |                                 |                            |
| C12_1—N2_1—B1_1—F3_1           | 112.8 (2)                       | C9_3—N1_3—B1_3—F3_3 117.1  |
| (2)                            |                                 |                            |
| C15_1—N2_1—B1_1—N1_1           | 176.8 (2)                       | C10_3—N1_3—B1_3—N2_3       |
| 178.1 (2)                      |                                 |                            |
| C12_1—N2_1—B1_1—N1_1           | -6.4 (3)                        | C9_3—N1_3—B1_3—N2_3 -2.2   |
| (3)                            |                                 |                            |
| C7_2—S1_2—C1_2—C6_2 -36.4 (2)  | C7_4—S1_4—C1_4—C6_4 -4.8 (2)    |                            |
| C7_2—S1_2—C1_2—C2_2 144.8 (2)  | C7_4—S1_4—C1_4—C2_4 176.37 (19) |                            |
| C6_2—C1_2—C2_2—C3_2 -1.3 (4)   | C6_4—C1_4—C2_4—C3_4 -1.3 (4)    |                            |
| S1_2—C1_2—C2_2—C3_2 177.4 (2)  | S1_4—C1_4—C2_4—C3_4 177.6 (2)   |                            |
| C1_2—C2_2—C3_2—C4_2 20.4 (4)   | C1_4—C2_4—C3_4—C4_4 -0.1 (4)    |                            |
| C2_2—C3_2—C4_2—F1_2 179.5 (2)  | C2_4—C3_4—C4_4—F1_4 -178.8 (2)  |                            |
| C2_2—C3_2—C4_2—C5_2 20.9 (4)   | C2_4—C3_4—C4_4—C5_4 1.5 (4)     |                            |

F1\_2—C4\_2—C5\_2—C6\_2 -179.8 (2)    F1\_4—C4\_4—C5\_4—C6\_4 178.9 (2)  
 C3\_2—C4\_2—C5\_2—C6\_2 -1.2 (4)    C3\_4—C4\_4—C5\_4—C6\_4 -1.4 (4)  
 C2\_2—C1\_2—C6\_2—C5\_2 1.0 (4) C2\_4—C1\_4—C6\_4—C5\_4 1.4 (4)  
 S1\_2—C1\_2—C6\_2—C5\_2 -177.7 (2)    S1\_4—C1\_4—C6\_4—C5\_4 -177.4 (2)  
 C4\_2—C5\_2—C6\_2—C1\_2 0.3 (4) C4\_4—C5\_4—C6\_4—C1\_4 -0.1 (4)  
 C1\_2—S1\_2—C7\_2—C8\_2 126.2 (2)    C1\_4—S1\_4—C7\_4—C8\_4 72.2 (2)  
 C1\_2—S1\_2—C7\_2—C10\_2    -60.5 (2)    C1\_4—S1\_4—C7\_4—C10\_4  
                                          -110.5 (2)  
 C10\_2—C7\_2—C8\_2—C9\_2    0.9 (3) C10\_4—C7\_4—C8\_4—C9\_4    1.4 (3)  
 S1\_2—C7\_2—C8\_2—C9\_2 175.20 (18)    S1\_4—C7\_4—C8\_4—C9\_4 179.09 (18)  
 C10\_2—C7\_2—C8\_2—C11\_2    -179.5 (2)    C10\_4—C7\_4—C8\_4—C11\_4  
                                          -179.6 (2)  
 S1\_2—C7\_2—C8\_2—C11\_2    -5.1 (4)    S1\_4—C7\_4—C8\_4—C11\_4  
                                          -1.9 (4)  
 C10\_2—N1\_2—C9\_2—C12\_2    -179.2 (2)    C10\_4—N1\_4—C9\_4—C12\_4  
                                          -177.1 (2)  
 B1\_2—N1\_2—C9\_2—C12\_2    3.4 (3) B1\_4—N1\_4—C9\_4—C12\_4    2.7 (3)  
 C10\_2—N1\_2—C9\_2—C8\_2    -0.2 (3)    C10\_4—N1\_4—C9\_4—C8\_4  
                                          1.4 (3)  
 B1\_2—N1\_2—C9\_2—C8\_2 -177.6 (2)    B1\_4—N1\_4—C9\_4—C8\_4 -178.8 (2)  
  
 C7\_2—C8\_2—C9\_2—C12\_2    178.5 (2)    C7\_4—C8\_4—C9\_4—C12\_4  
                                          176.5 (2)  
 C11\_2—C8\_2—C9\_2—C12\_2    -1.2 (4)    C11\_4—C8\_4—C9\_4—C12\_4  
                                          -2.5 (4)

|                                      |                                       |
|--------------------------------------|---------------------------------------|
| C7_2—C8_2—C9_2—N1_2-0.4 (3)          | C7_4—C8_4—C9_4—N1_4-1.7 (3)           |
| C11_2—C8_2—C9_2—N1_2<br>179.2 (2)    | 179.9 (2) C11_4—C8_4—C9_4—N1_4        |
| C9_2—N1_2—C10_2—C7_2<br>(3)          | 0.8 (3) C9_4—N1_4—C10_4—C7_4 -0.5     |
| B1_2—N1_2—C10_2—C7_2<br>179.7 (2)    | 178.0 (2) B1_4—N1_4—C10_4—C7_4        |
| C9_2—N1_2—C10_2—C14_2<br>-179.8 (2)  | -179.6 (2) C9_4—N1_4—C10_4—C14_4      |
| B1_2—N1_2—C10_2—C14_2<br>0.4 (4)     | -2.4 (4) B1_4—N1_4—C10_4—C14_4        |
| C8_2—C7_2—C10_2—N1_2<br>-0.6 (3)     | -1.1 (3) C8_4—C7_4—C10_4—N1_4         |
| S1_2—C7_2—C10_2—N1_2<br>-178.38 (17) | -175.35 (17) S1_4—C7_4—C10_4—N1_4     |
| C8_2—C7_2—C10_2—C14_2<br>178.6 (2)   | 179.4 (2) C8_4—C7_4—C10_4—C14_4       |
| S1_2—C7_2—C10_2—C14_2                | 5.1 (4) S1_4—C7_4—C10_4—C14_4 0.8 (4) |
| N1_2—C9_2—C12_2—C13_2<br>(3)         | 0.8 (3) N1_4—C9_4—C12_4—C13_4 -0.3    |
| C8_2—C9_2—C12_2—C13_2<br>-178.4 (2)  | -178.0 (2) C8_4—C9_4—C12_4—C13_4      |
| C9_2—C12_2—C13_2—N2_2<br>-0.4 (3)    | -0.4 (3) C9_4—C12_4—C13_4—N2_4        |
| C9_2—C12_2—C13_2—C15_2<br>-179.8 (2) | 177.8 (2) C9_4—C12_4—C13_4—C15_4      |
| C17_2—N2_2—C13_2—C12_2<br>-179.3 (2) | 178.7 (2) C17_4—N2_4—C13_4—C12_4      |

|                         |              |                         |          |
|-------------------------|--------------|-------------------------|----------|
| B1_2—N2_2—C13_2—C12_2   | -4.3 (3)     | B1_4—N2_4—C13_4—C12_4   |          |
|                         | -1.2 (3)     |                         |          |
| C17_2—N2_2—C13_2—C15_2  | 0.2 (3)      | C17_4—N2_4—C13_4—C15_4  | 0.3 (2)  |
| B1_2—N2_2—C13_2—C15_2   | 177.2 (2)    | B1_4—N2_4—C13_4—C15_4   |          |
|                         | 178.4 (2)    |                         |          |
| C12_2—C13_2—C15_2—C16_2 | -178.1 (2)   | C12_4—C13_4—C15_4—C16_4 |          |
|                         | 179.5 (2)    |                         |          |
| N2_2—C13_2—C15_2—C16_2  | 0.2 (3)      | N2_4—C13_4—C15_4—C16_4  | 0.1 (2)  |
| C12_2—C13_2—C15_2—C18_2 | 1.4 (4)      | C12_4—C13_4—C15_4—C18_4 | -0.4 (4) |
| N2_2—C13_2—C15_2—C18_2  | 179.6 (2)    | N2_4—C13_4—C15_4—C18_4  |          |
|                         | -179.9 (2)   |                         |          |
| C13_2—C15_2—C16_2—C17_2 | -0.5 (3)     | C13_4—C15_4—C16_4—C17_4 |          |
|                         | -0.4 (3)     |                         |          |
| C18_2—C15_2—C16_2—C17_2 | -180.0 (2)   | C18_4—C15_4—C16_4—C17_4 |          |
|                         | 179.6 (2)    |                         |          |
| C13_2—C15_2—C16_2—Br1_2 | 178.37 (17)  | C13_4—C15_4—C16_4—Br1_4 |          |
|                         | -177.48 (17) |                         |          |
| C18_2—C15_2—C16_2—Br1_2 | -1.1 (4)     | C18_4—C15_4—C16_4—Br1_4 |          |
|                         | 2.5 (4)      |                         |          |
| C13_2—N2_2—C17_2—C16_2  | -0.5 (3)     | C13_4—N2_4—C17_4—C16_4  |          |
|                         | -0.5 (2)     |                         |          |
| B1_2—N2_2—C17_2—C16_2   | -177.5 (2)   | B1_4—N2_4—C17_4—C16_4   |          |
|                         | -178.6 (2)   |                         |          |
| C13_2—N2_2—C17_2—C19_2  | 179.9 (2)    | C13_4—N2_4—C17_4—C19_4  |          |
|                         | 180.0 (2)    |                         |          |
| B1_2—N2_2—C17_2—C19_2   | 3.0 (4)      | B1_4—N2_4—C17_4—C19_4   | 1.9 (4)  |



|                         |              |                         |          |
|-------------------------|--------------|-------------------------|----------|
| C15_2—C16_2—C17_2—N2_2  | 0.6 (3)      | C15_4—C16_4—C17_4—N2_4  | 0.6 (3)  |
| Br1_2—C16_2—C17_2—N2_2  | -178.25 (16) | Br1_4—C16_4—C17_4—N2_4  |          |
|                         | 177.79 (16)  |                         |          |
| C15_2—C16_2—C17_2—C19_2 | -179.8 (2)   | C15_4—C16_4—C17_4—C19_4 |          |
|                         | -179.9 (2)   |                         |          |
| Br1_2—C16_2—C17_2—C19_2 | 1.3 (4)      | Br1_4—C16_4—C17_4—C19_4 | -2.7     |
|                         | (4)          |                         |          |
| C17_2—N2_2—B1_2—F2_2    | -55.9 (3)    | C10_4—N1_4—B1_4—F2_4    |          |
|                         | 56.9 (3)     |                         |          |
| C13_2—N2_2—B1_2—F2_2    | 127.6 (2)    | C9_4—N1_4—B1_4—F2_4     | -122.9   |
|                         | (2)          |                         |          |
| C17_2—N2_2—B1_2—F3_2    | 64.6 (3)     | C10_4—N1_4—B1_4—F3_4    |          |
|                         | -64.6 (3)    |                         |          |
| C13_2—N2_2—B1_2—F3_2    | -111.9 (2)   | C9_4—N1_4—B1_4—F3_4     | 115.6    |
|                         | (2)          |                         |          |
| C17_2—N2_2—B1_2—N1_2    | -176.4 (2)   | C10_4—N1_4—B1_4—N2_4    |          |
|                         | 176.1 (2)    |                         |          |
| C13_2—N2_2—B1_2—N1_2    | 7.1 (3)      | C9_4—N1_4—B1_4—N2_4     | -3.7 (3) |
|                         |              |                         |          |
| C10_2—N1_2—B1_2—F2_2    | 55.9 (3)     | C17_4—N2_4—B1_4—F2_4    |          |
|                         | -59.6 (3)    |                         |          |
| C9_2—N1_2—B1_2—F2_2     | -127.3 (2)   | C13_4—N2_4—B1_4—F2_4    | 122.6    |
|                         | (2)          |                         |          |
| C10_2—N1_2—B1_2—F3_2    | -64.6 (3)    | C17_4—N2_4—B1_4—F3_4    |          |
|                         | 61.0 (3)     |                         |          |
| C9_2—N1_2—B1_2—F3_2     | 112.3 (2)    | C13_4—N2_4—B1_4—F3_4    | -116.8   |
|                         | (2)          |                         |          |
| C10_2—N1_2—B1_2—N2_2    | 176.5 (2)    | C17_4—N2_4—B1_4—N1_4    |          |
|                         | -179.3 (2)   |                         |          |

C9\_2—N1\_2—B1\_2—N2\_2—6.7 (3)      C13\_4—N2\_4—B1\_4—N1\_4      2.9 (3)

Hydrogen-bond geometry (Å, °)

D—H···A      D—H    H···A    D···A    D—H···A

C13\_1—H13\_1···F3\_2      0.95    2.55    3.173 (3)      123

C18\_1—H18C\_1···F2\_3      0.98    2.38    3.213 (3)      142

C2\_2—H2\_2···F1\_4    0.95    2.51    3.461 (3)      175

C19\_2—H19B\_2···F2\_4i    0.98    2.44    3.261 (3)      141

C14\_3—H14B\_3···F3\_3      0.98    2.55    3.221 (3)      126

C14\_3—H14B\_3···F3\_4ii    0.98    2.5      3.330 (3)      143

C19\_3—H19C\_3···F3\_3      0.98    2.46    3.170 (3)      129

C14\_4—H14A\_4···S1\_4      0.98    2.87    3.342 (3)      111

C14\_4—H14A\_4···F1\_4iii    0.98    2.5      3.349 (3)      144

C19\_4—H19C\_4···F3\_4      0.98    2.46    3.168 (3)      129

Symmetry codes: (i)  $-x+1, -y, -z$ ; (ii)  $-x+1, -y+1, -z+1$ ; (iii)  $-x+1, -y+1, -z$ .
